# Supplementary material for: Revealing the Bacterial Butyrate Synthesis Pathways by Analyzing (Meta)genomic Data
Source: PubMed Central journal article supplement — mBio. 2014 Apr 22;5(2):e00889-14. doi: 10.1128/mBio.00889-14 (PMC3994512; doi:10.1128/mbio.00889-14), 2014-04-22

Acetonema  
longum APO-1  
DSM 6540

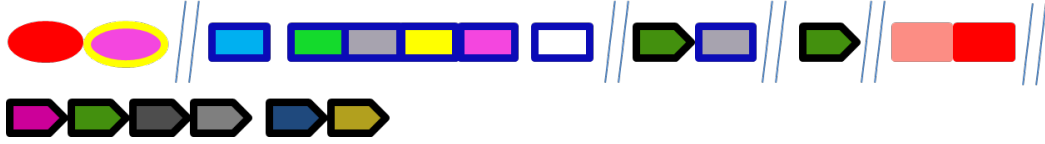

Acidaminococcus  
fermentans VR4  
DSM 20731

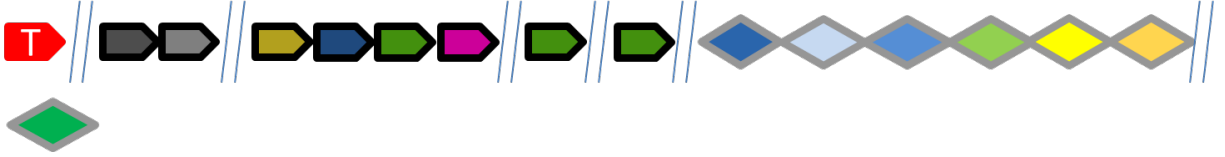

Acidaminococcus  
sp. D21

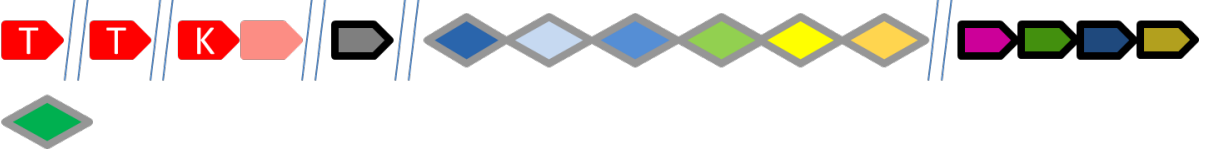

Alistipes  
putredinis  
DSM 17216

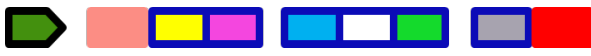

Alkaliphilus  
metalliredigens  
QYMF

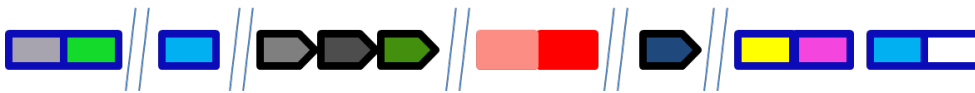

Alkaliphilus  
oremlandii  
OhILAs

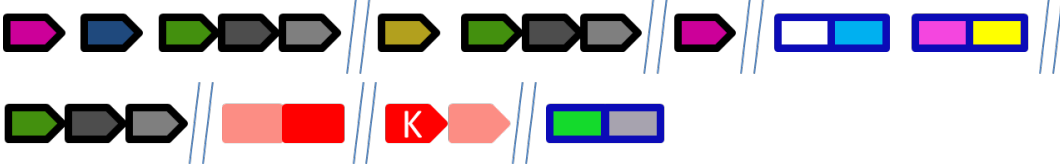

Anaerococcus  
hydrogenalis  
ACS-025-V-Sch4

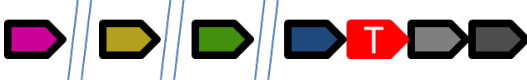

Anaerococcus  
hydrogenalis  
DSM 7454

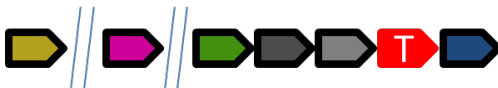

Anaerococcus  
lactolyticus  
ATCC 51172

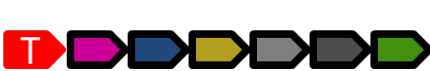

Anaerococcus  
prevotii PC 1  
DSM 20548

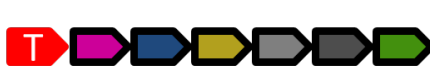

Anaerococcus  
tetradius ATCC  
35098

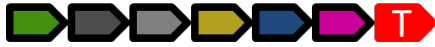

Anaerococcus  
vaginalis ATCC  
51170

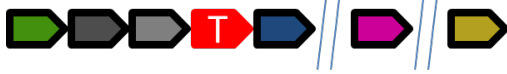

Anaerofustis  
stercorihominis  
DSM 17244

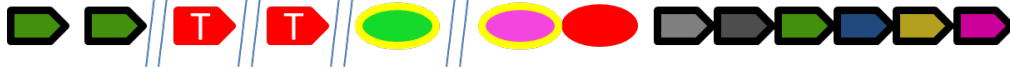

Anaeromyxobact  
er dehalogenans  
2CP-1

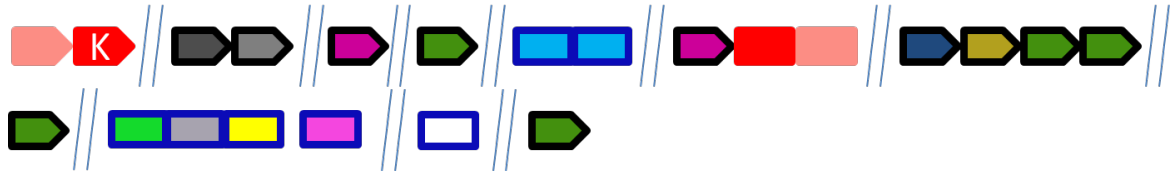

Anaeromyxobact  
er dehalogenans  
2CP-C

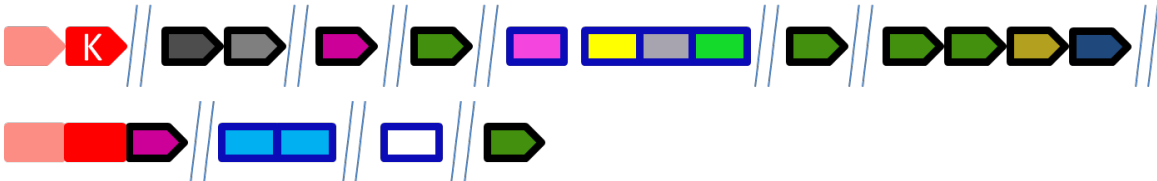

Anaeromyxobact  
er sp K

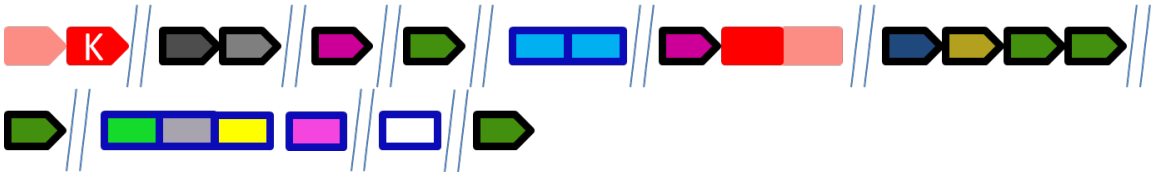

Anaeromyxobact  
er sp. Fw109-5

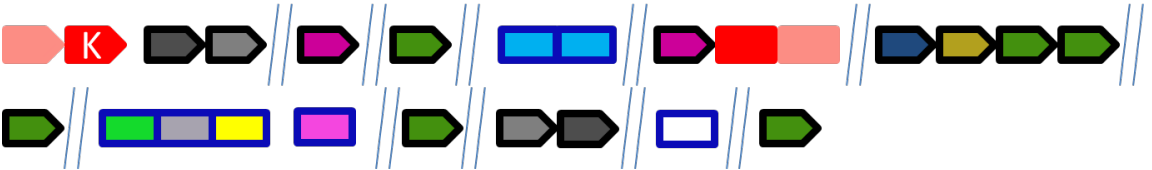

Anaerostipes  
caccae  
DSM 14662

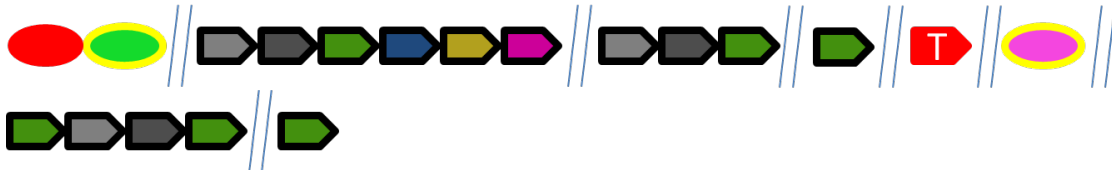

Anaerostipes sp.  
3\_2\_56FAA

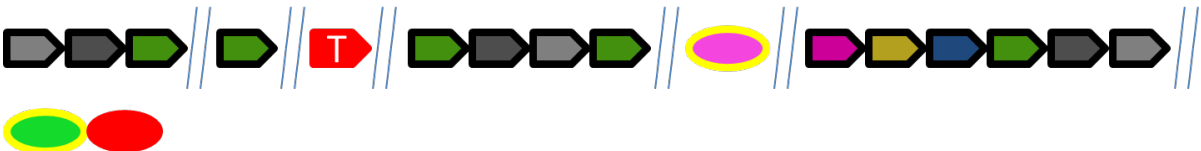

Anaerotruncus  
colihominis DSM  
17241

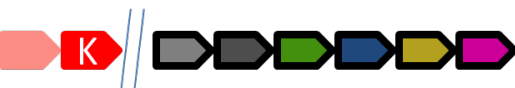

Bacteroidetes  
sp. F0058

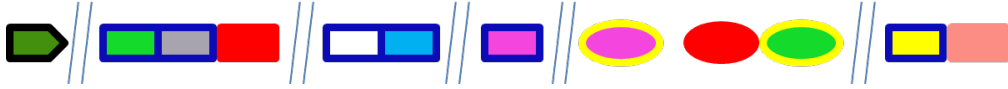

Brachyspira  
hyodysenteriae  
WA1,  
ATCC 49526

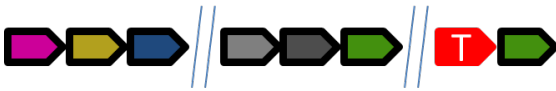

Brachyspira  
murdochii  
56-150,  
DSM 12563

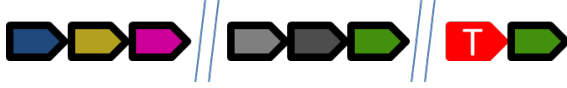

Brachyspira  
pilosicoli  
95/1000

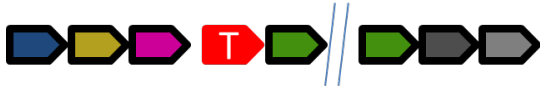

Butyrivibrio  
crossotus  
DSM 2876

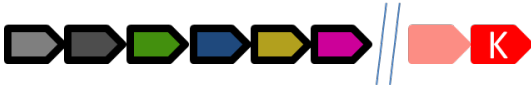

Butyrivibrio  
fibrisolvens 16/4

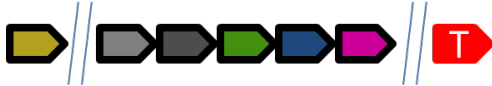

Butyrivibrio  
proteoclasticus  
B316

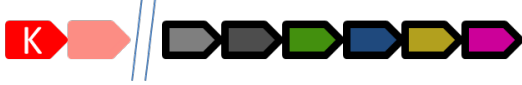

Candidatus  
Cloacamonas  
acidaminovorans

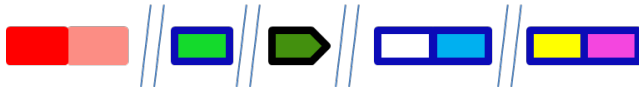

Carboxydibrachium  
pacificum JM,  
DSM 12653

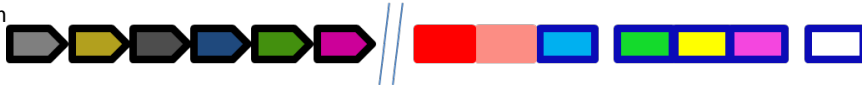

Carboxydotherrmus  
hydrogeno-  
formans Z-2901

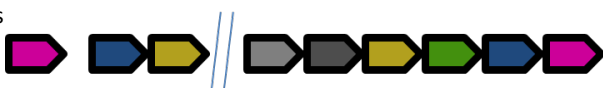

Carnobacterium  
sp:  
• 17-4  
• AT7

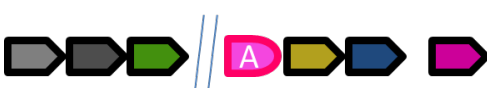

Clostridiales sp.  
SS3/4

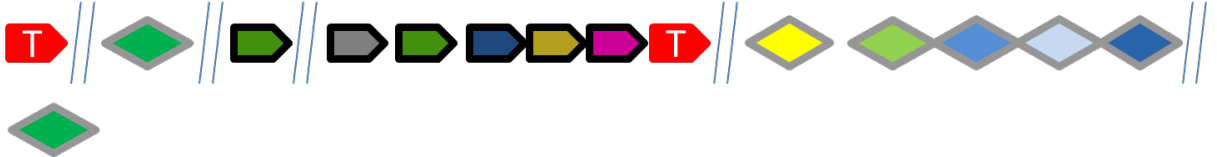

Clostridiales sp.  
SSC/2

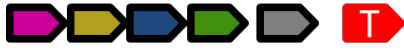

Clostridium  
acetobutylicum  
• ATCC 824  
• DSM 1731

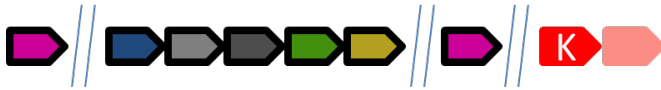

Clostridium  
acetobutylicum  
EA 2018

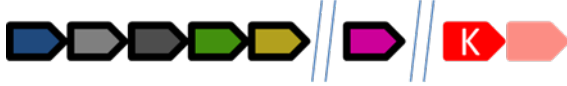

Clostridium  
beijerinckii  
NCIMB 8052

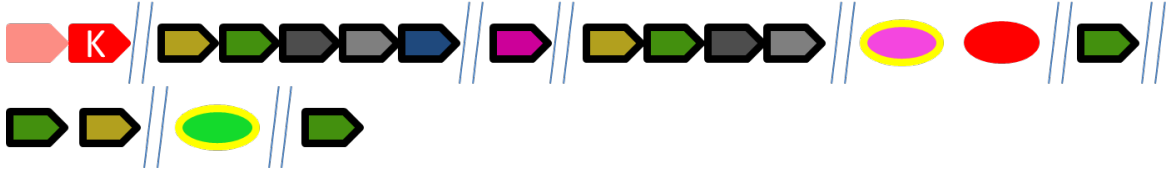

Clostridium  
botulinum:

- A2 Kyoto-F
- Ba4 657
- Bf
- BoNT/A1 Hall
- BoNT/A1, ATCC 19397
- BoNT/A3 Loch Maree
- BoNT/B1 Okra
- F Langeland
- H04402 065
- F 230613
- NCTC 2916
- type A - Hall

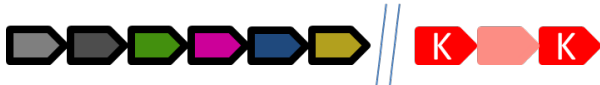

Clostridium  
botulinum:

- B Eklund 17B
- E1 BoNT E Beluga
- E3 Alaska E43

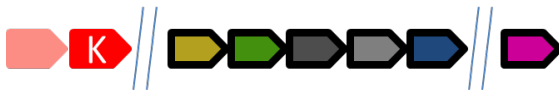

Clostridium  
botulinum  
BKT015925

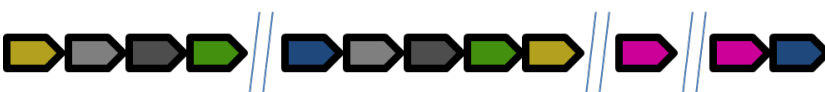

Clostridium  
botulinum D  
1873

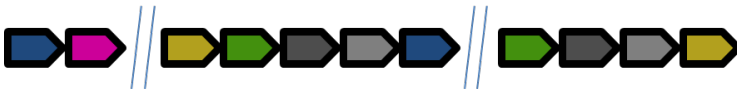

Clostridium  
botulinum type C  
- Eklund

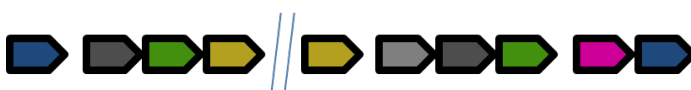

Clostridium butyricum 5521

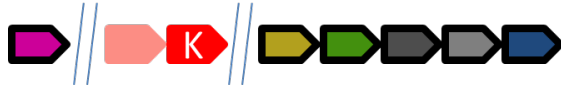

Clostridium butyricum E4, BoNT E BL5262

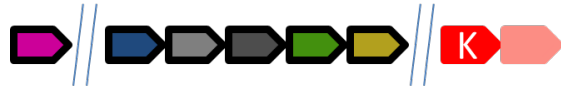

Clostridium carboxidivorans P7, DSM 15243 (1)

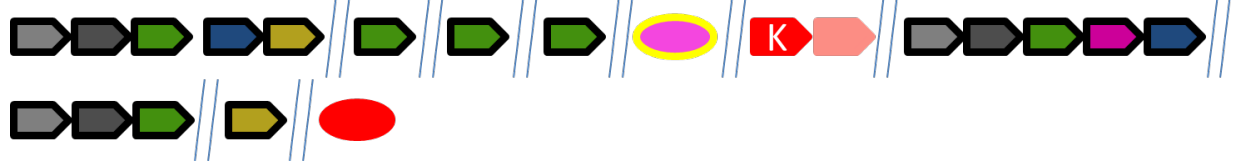

Clostridium carboxidivorans P7, DSM 15243 (2)

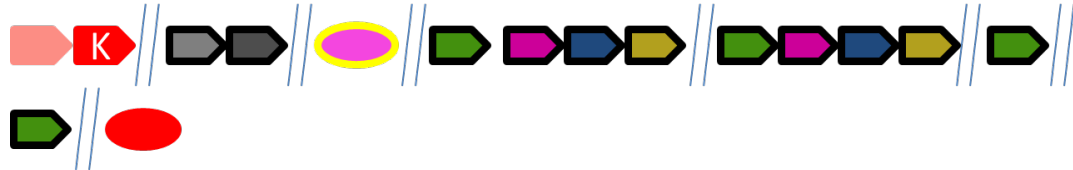

Clostridium cellulovorans 743B, ATCC 35296 (1)

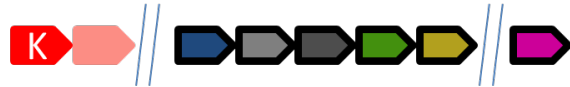

Clostridium cellulovorans 743B, ATCC 35296 (2)

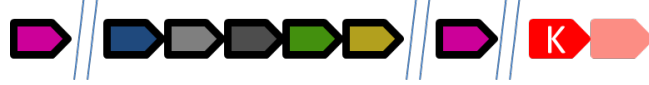

Clostridium cf. saccharolyticum K10

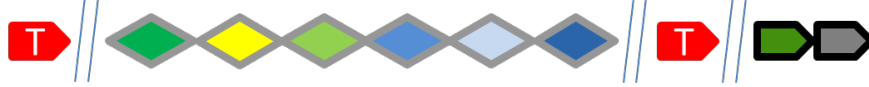

Clostridium difficile 630 (epidemic type X)

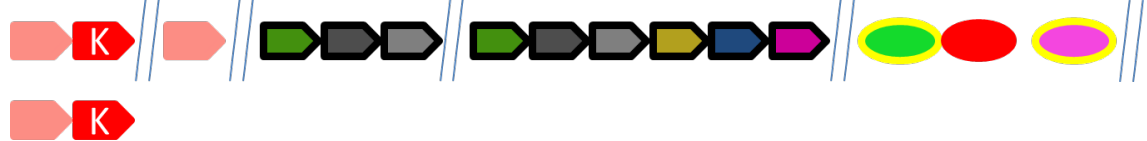

Clostridium difficile:

- BI9
- CD196
- QCD 32g58
- QCD 66c26
- QCD R20291

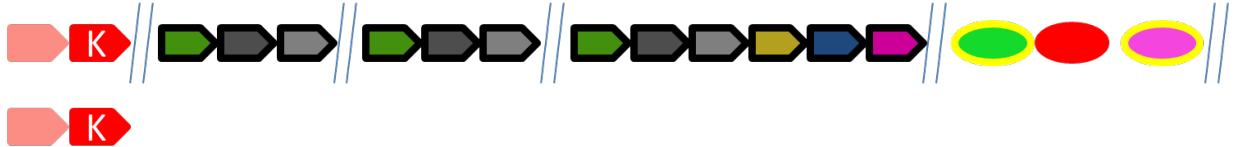

Clostridium difficile CIP 107932

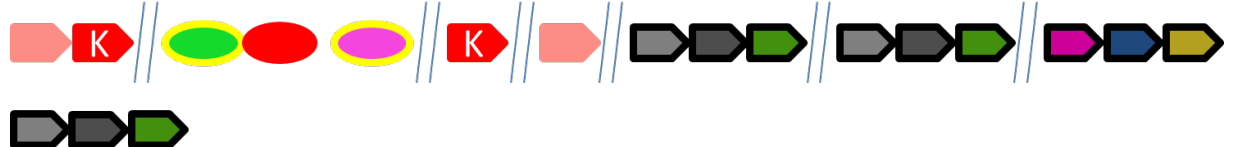

Clostridium difficile NAP07

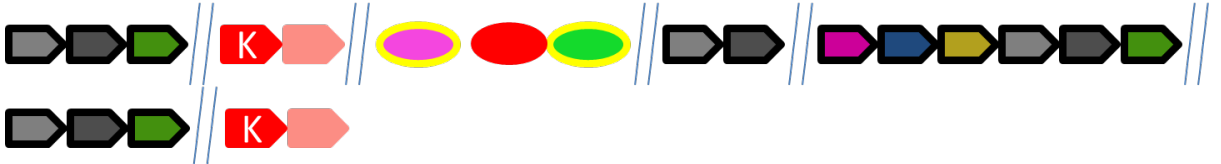

Clostridium  
difficile NAP08

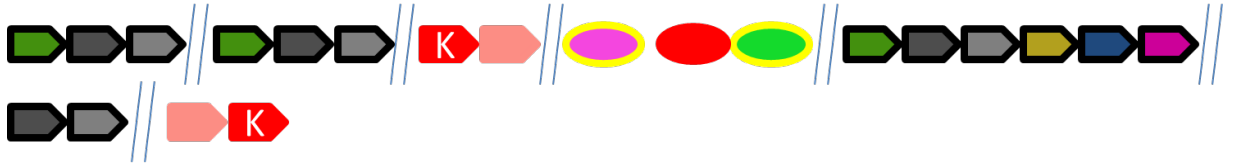

Clostridium  
difficile  
QCD-23m63

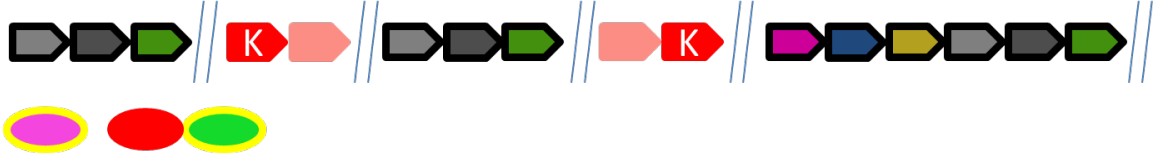

Clostridium  
difficile  
QCD-37x79,  
NAP1a/001

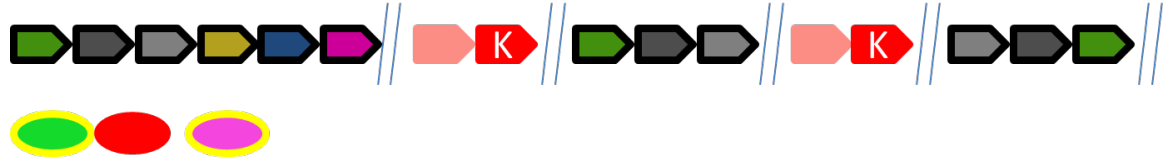

Clostridium  
difficile  
QCD-63q42

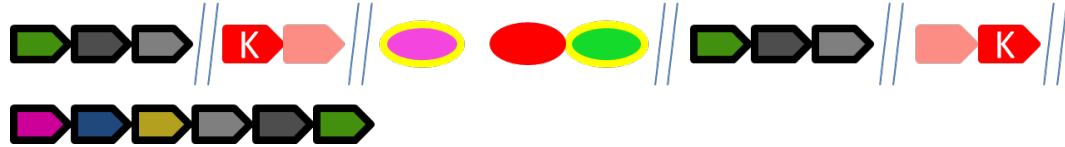

Clostridium  
difficile  
QCD-76w55,  
NAP1

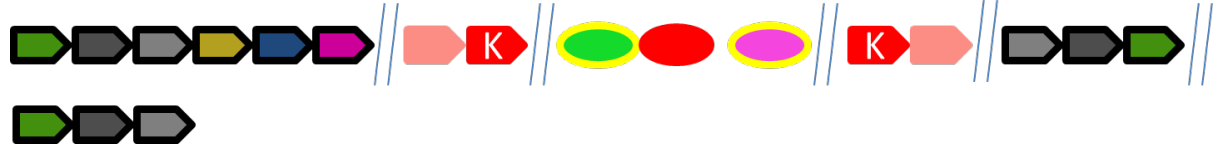

Clostridium  
difficile  
QCD-97b34,  
NAP1b/006

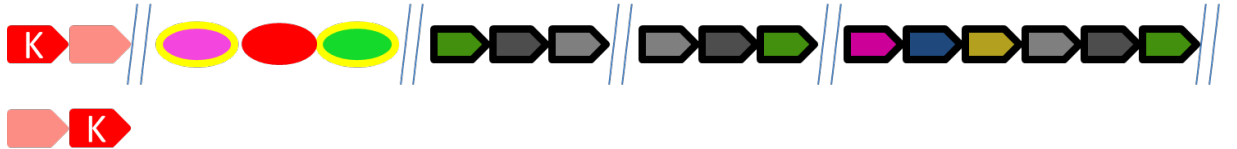

Clostridium  
kluyveri:  
• DSM 555  
• NBRC12016

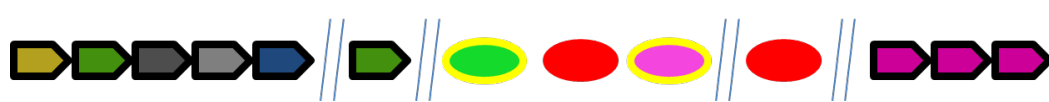

Clostridium  
novyi  
NT

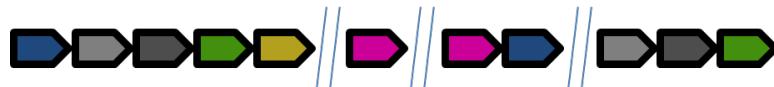

Clostridium  
perfringens  
• 13  
• ATCC 13124  
• CPE F4969  
• NCTC 8239  
• SM101  
• type C -  
JGS1495  
• type D -  
JGS1721

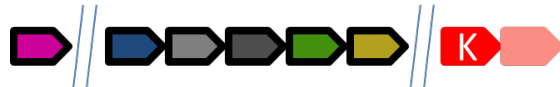

Clostridium  
perfringens:

- type B - ATCC 3626
- type E - JGS1987

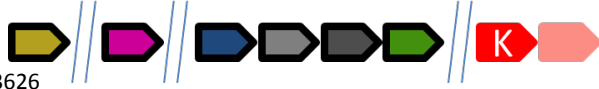

Clostridium sp.  
M62/1

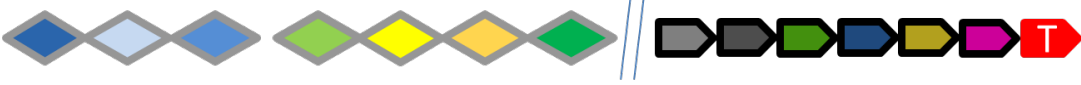

Clostridium sp.  
7\_2\_43FAA

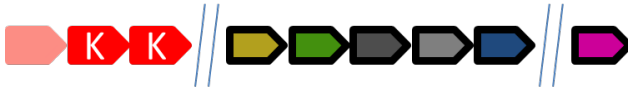

Clostridium sp.  
HGF2

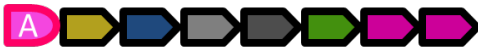

Clostridium sp.  
L2-50

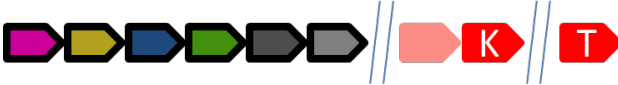

Clostridium sp.  
SS2/1

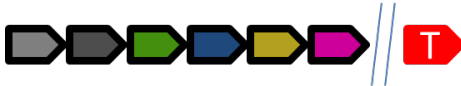

Clostridium sp.  
SY8519

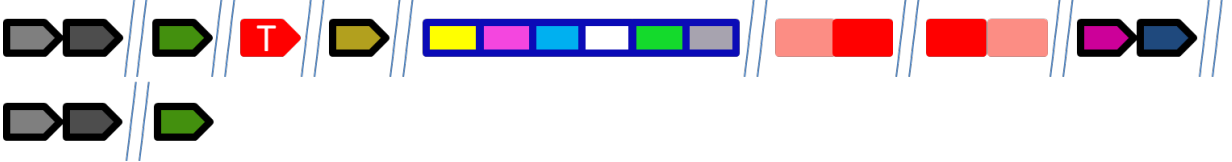

Clostridium  
sporogenes  
ATCC 15579

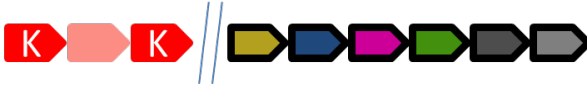

Clostridium  
sticklandii  
DSM 519

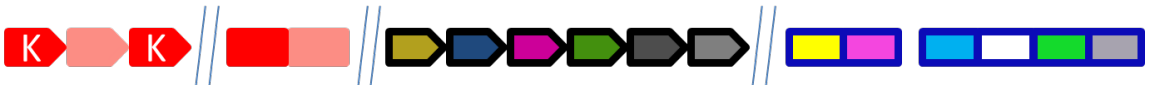

Clostridium  
symbiosum  
WAL-14163

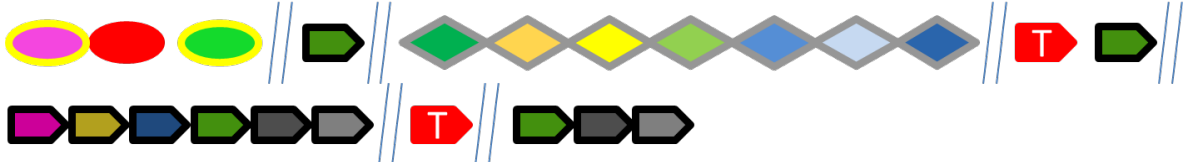

Clostridium  
symbiosum  
WAL-14673

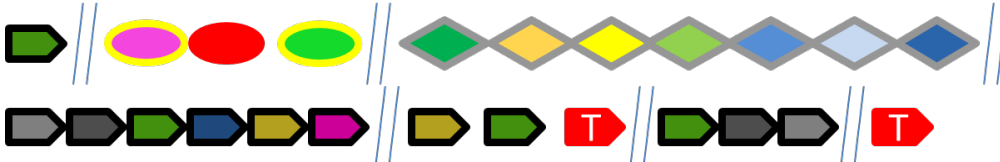

Clostridium  
tetani  
Massachusetts  
E88

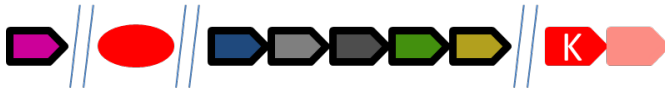

Coprococcus  
catus GD/7

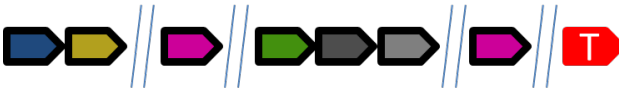

Coprococcus  
comes  
ATCC 27758

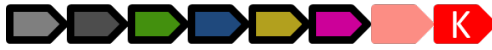

Coprococcus  
eutactus  
ATCC 27759

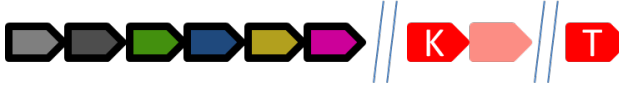

Deferribacter  
desulfuricans  
SSM1,  
DSM 14783

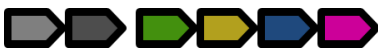

Delta  
proteobacterium  
NaphS2

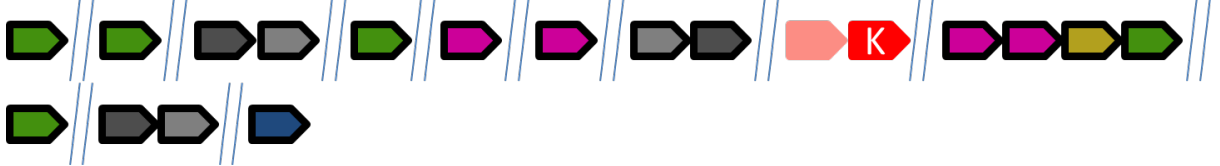

Desmospora sp.  
8437

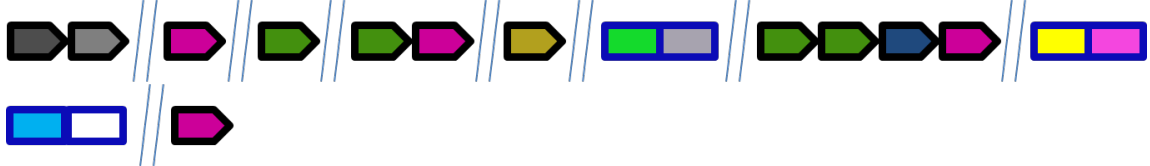

Desulfarculus  
baarsii 2st14,  
DSM 2075

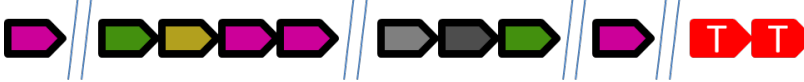

Desulfitobacterium  
hafniense DCB-2

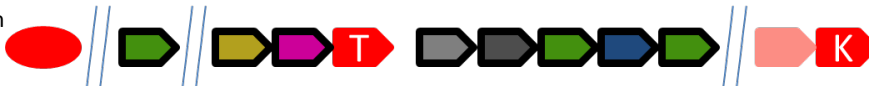

Desulfitobacterium  
hafniense Y51

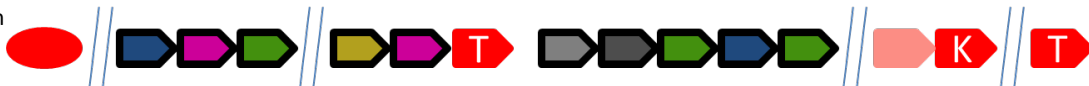

Desulfobulbus  
propionicus 1pr3,  
DSM 2032

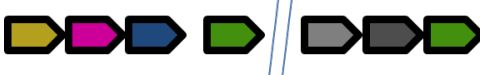

Desulfotomaculum  
acetoxidans 5575,  
DSM 771

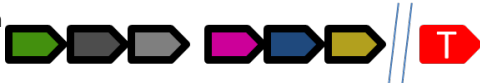



Desulfotomaculum  
reducens MI-1

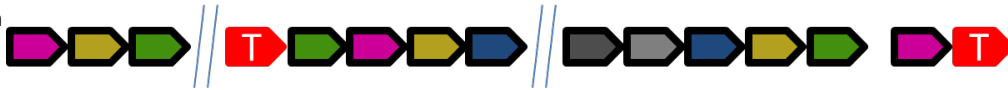

Desulfurispirillum  
indicum S5

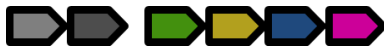

Dethiobacter  
alkaliphilus AHT1

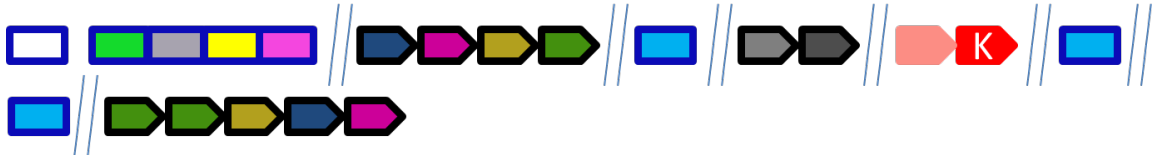

Erysipelotrichaceae  
bacterium  
5\_2\_54FAA

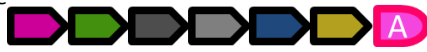

Erysipelotrichaceae  
bacterium  
sp. 3\_1\_53

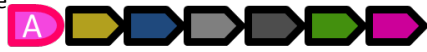

Eubacterium  
biforme  
DSM 3989

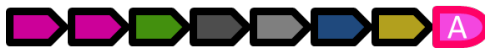

Eubacterium  
cellulosolvens 6

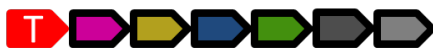

Eubacterium  
dolichum  
DSM 3991

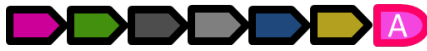

Eubacterium  
hallii  
DSM 3353

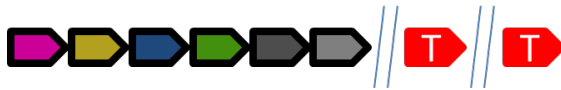

Eubacterium  
limosum KIST612

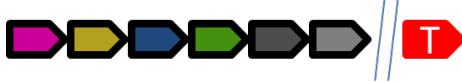

Eubacterium  
rectale  
ATCC 33656

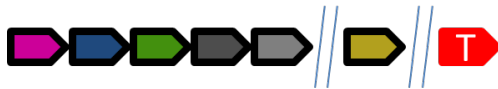

Eubacterium  
rectale  
DSM 17629

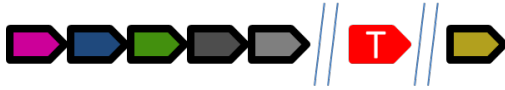

Eubacterium  
rectale M104/1

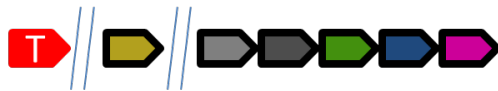

Eubacterium  
saburreum DSM  
3986

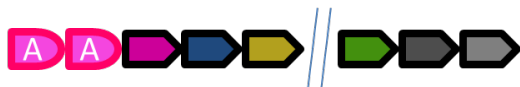

Eubacterium  
saphenum ATCC  
49989

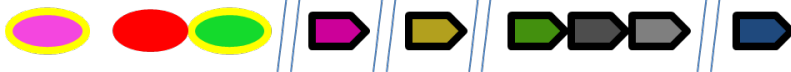

Eubacterium  
ventriosum ATCC  
27560

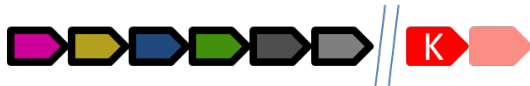

Eubacterium  
yurii margaretiae  
ATCC 43715

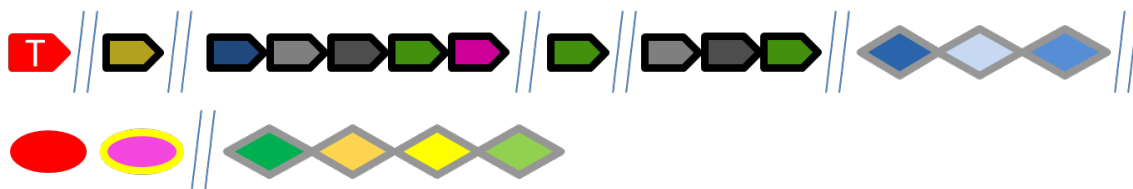

Faecalibacterium  
cf. prausnitzii  
KLE1255

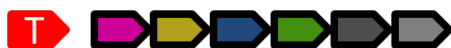

Faecalibacterium  
prausnitzii

- A2-165
- SL3/3

Faecalibacterium  
prausnitzii

- L2-6
- M21/2

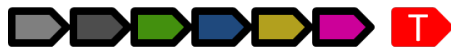

Fervidobacteriu  
m nodosum  
Rt17-B1

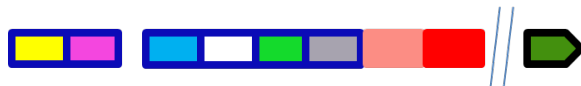

Fusobacterium  
gonidiaformans  
ATCC 25563

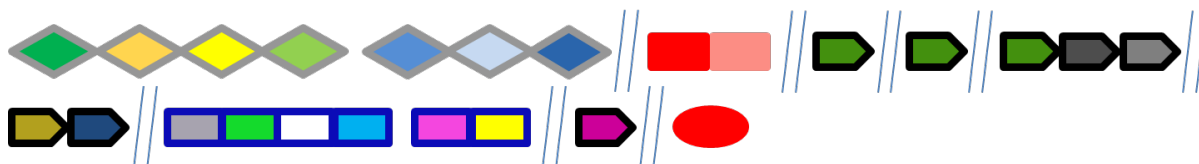

Fusobacterium  
mortiferum  
ATCC 9817

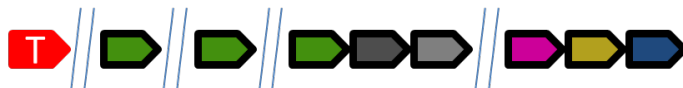

Fusobacterium  
nucleatum  
nucleatum ATCC  
23726

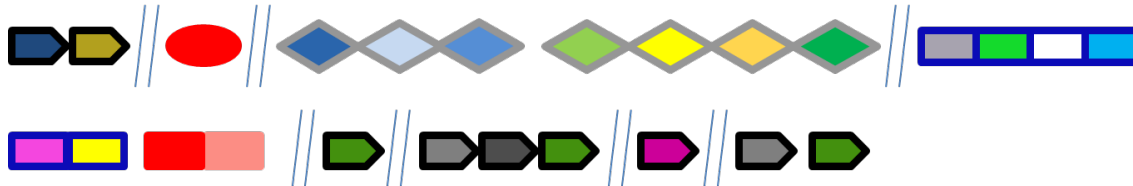

Fusobacterium  
nucleatum  
nucleatum  
ATCC 25586

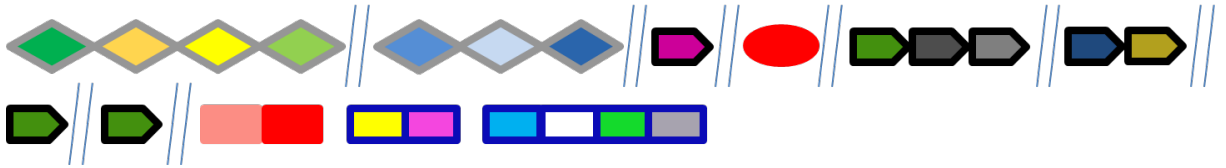

Fusobacterium  
nucleatum  
polymorphum  
ATCC 10953

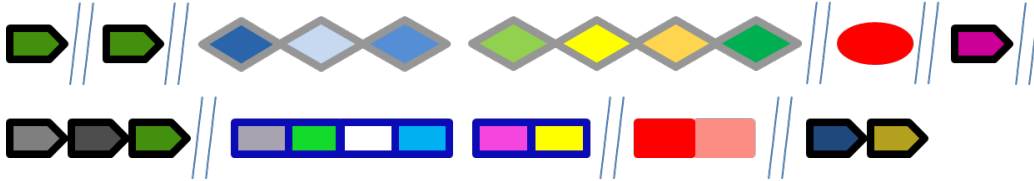

Fusobacterium  
nucleatum  
vincentii  
ATCC 49256

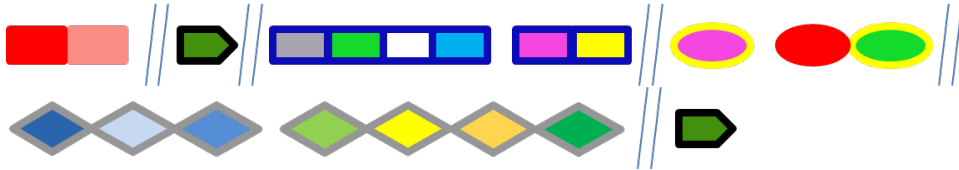

Fusobacterium  
periodonticum  
ATCC 33693

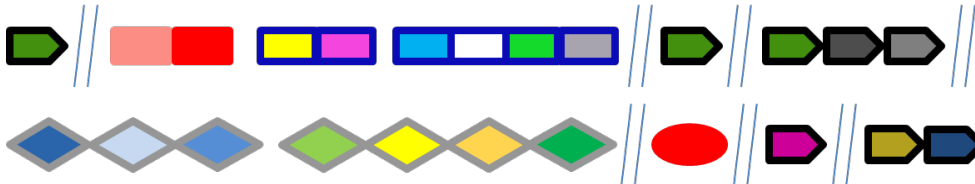

Fusobacterium  
sp. 1\_1\_41FAA

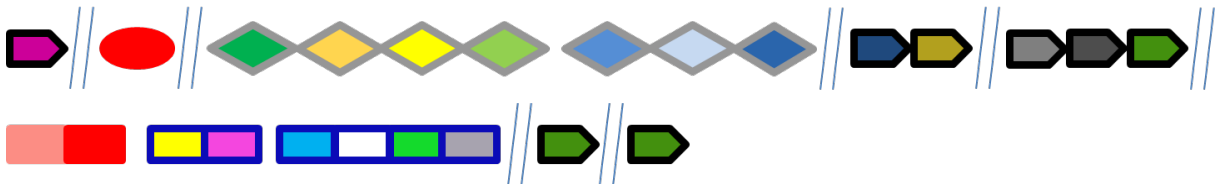

Fusobacterium  
sp. 11\_3\_2

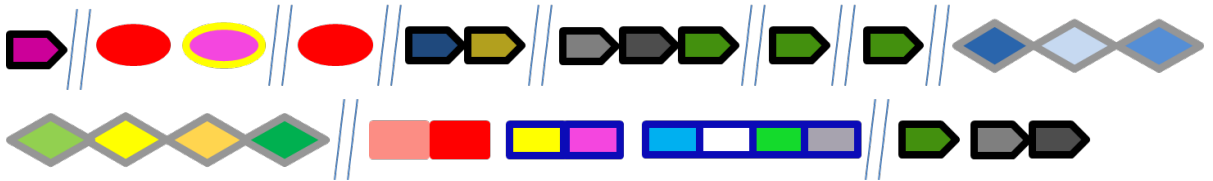

Fusobacterium  
sp. 2\_1\_31

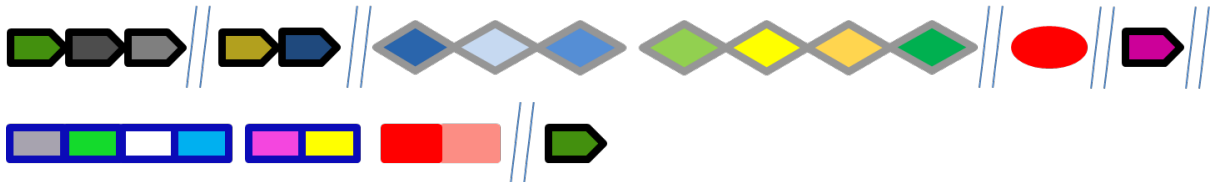

Fusobacterium  
sp. 21\_1A

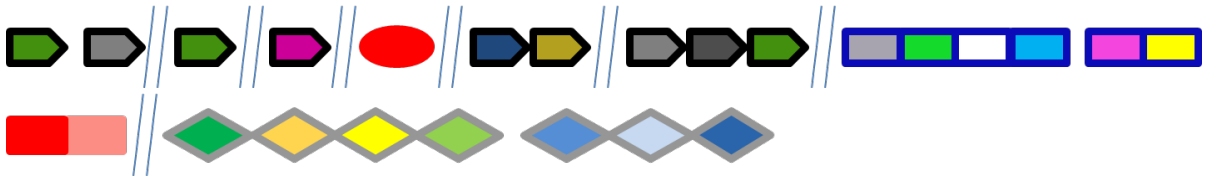

Fusobacterium  
sp. 3\_1\_27

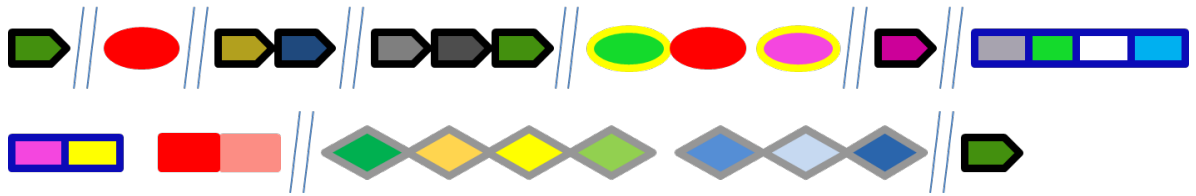

Fusobacterium  
sp. 3\_1\_33

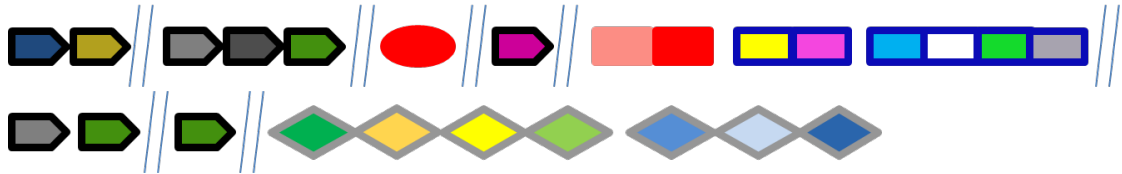

Fusobacterium  
sp. 3\_1\_36A2

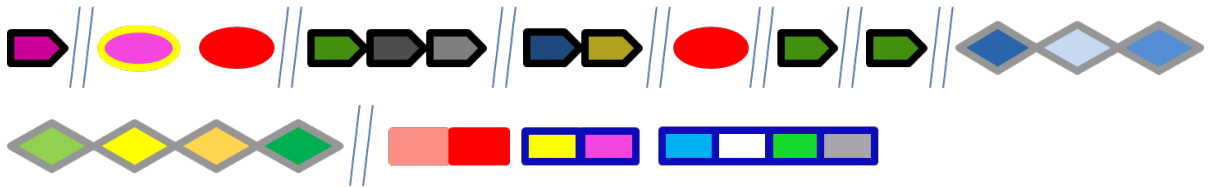

Fusobacterium  
sp. 3\_1\_5R

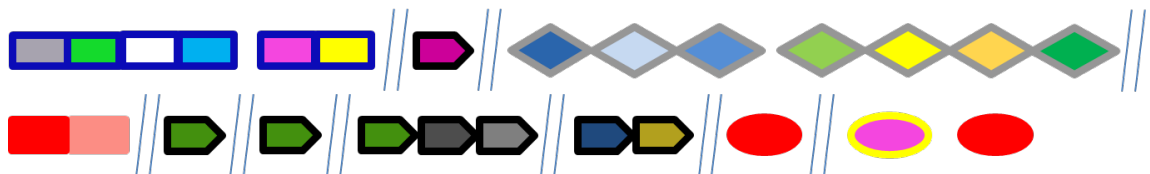

Fusobacterium  
sp. 4\_1\_13

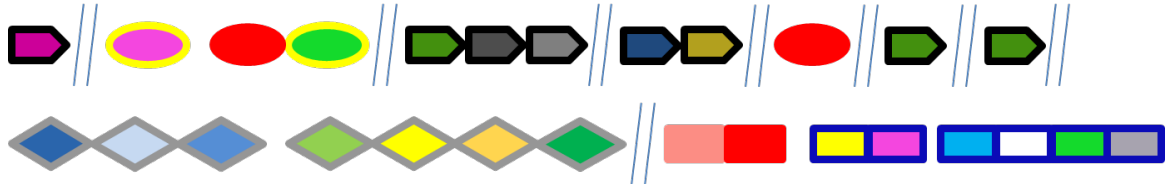

Fusobacterium  
sp. 7\_1

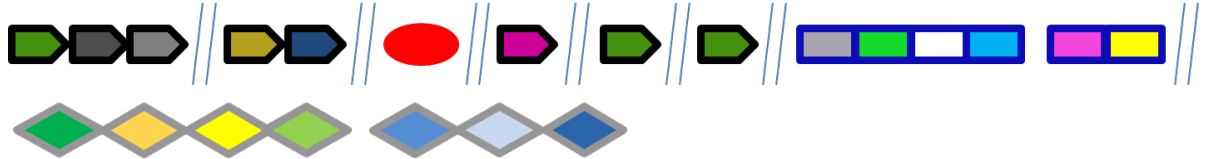

Fusobacterium  
sp. D11

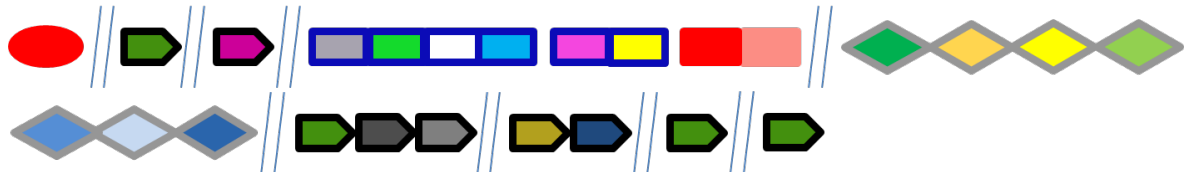

Fusobacterium  
sp. D12

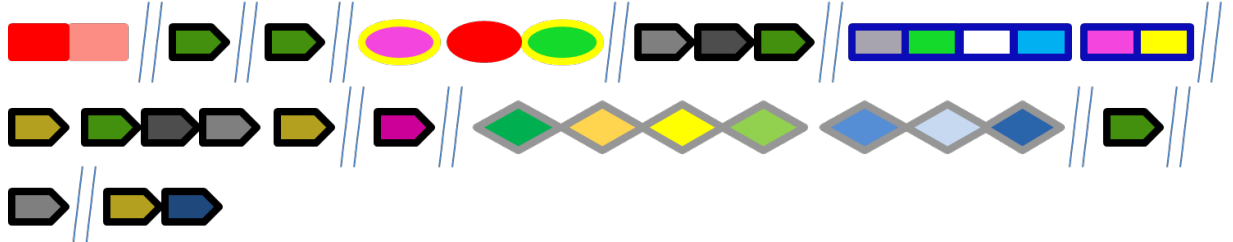

Fusobacterium  
ulcerans  
ATCC 49185

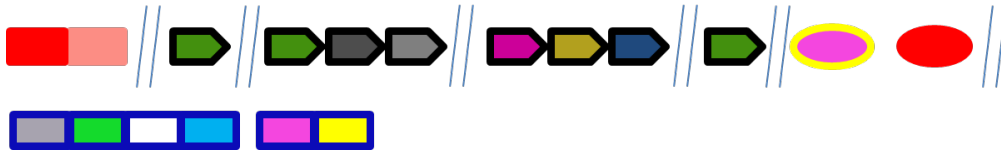

Fusobacterium  
varium  
ATCC 27725

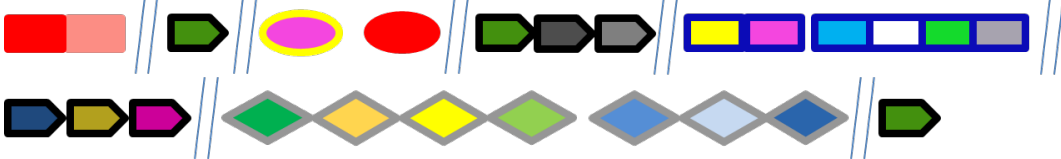

Geobacter  
bemidjensis  
Bem,  
DSM 16622

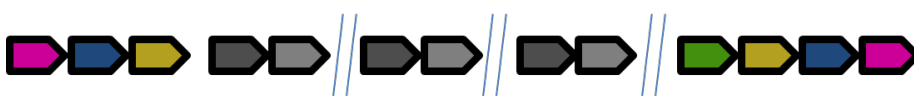

Geobacter  
metallireducens  
GS-15

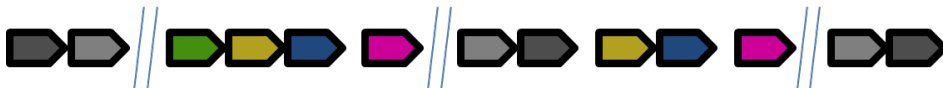

Geobacter sp.  
FRC-32

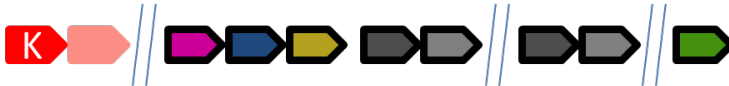

Geobacter sp.  
M18

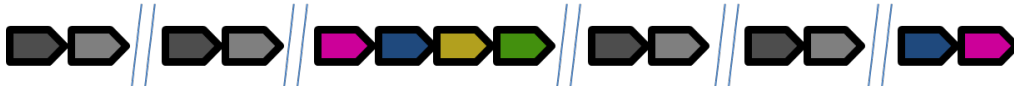

Geobacter sp.  
M21

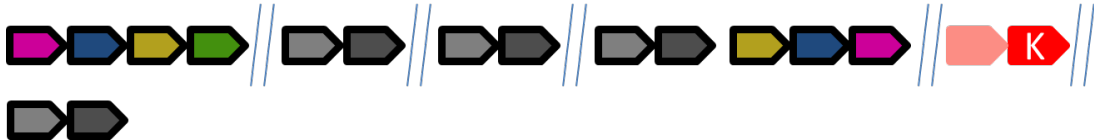

Geobacter  
uraniireducens  
Rf4

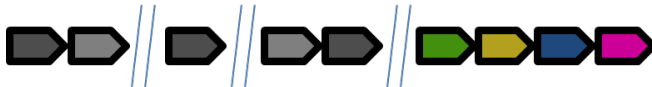

Halanaerobium  
praevalens GSL,  
DSM 2228

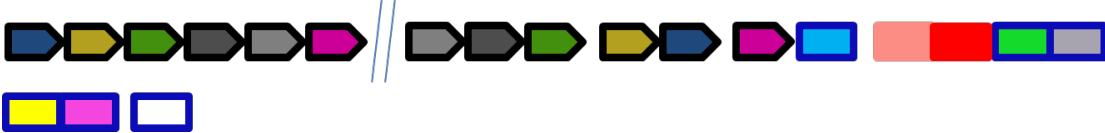

Haliangium  
ochraceum  
SMP-2,  
DSM 14365

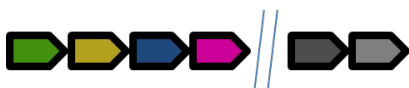

Haloplasma  
contractile  
SSD-17B

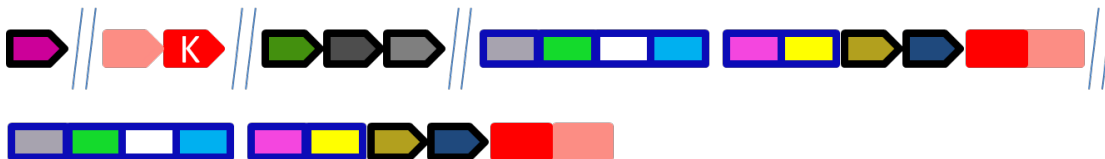

Heliobacterium  
modesticaldum  
Ice1

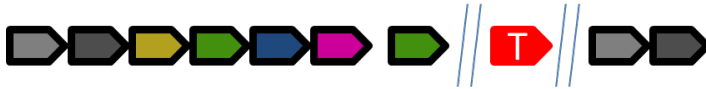

Ilyobacter  
polytropus  
CuHBu1,  
DSM 2926

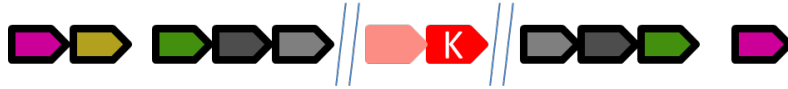

Intrasporangium  
calvum 7KIP,  
DSM 43043

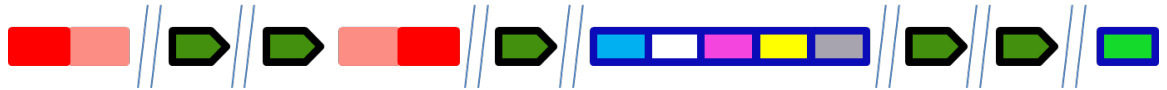

Janibacter sp.  
HTCC2649

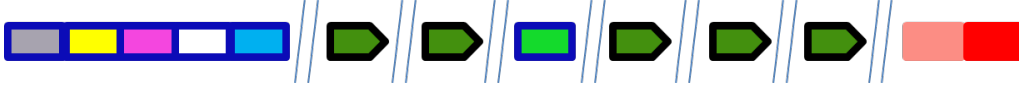

Kosmotoga  
olearia TBF  
19.5.1

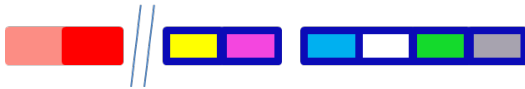

Kribbella flavida  
IFO 14399, DSM  
17836

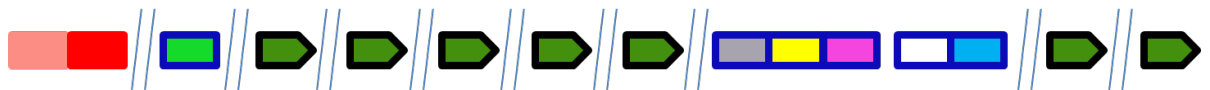

Lachnospiraceae  
bacterium  
3\_1\_57FAA\_CT1

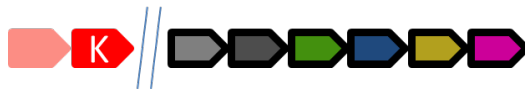

Lachnospiraceae  
bacterium sp.  
5\_1\_63FAA

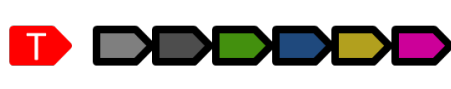

Lachnospiraceae  
sp. F0167

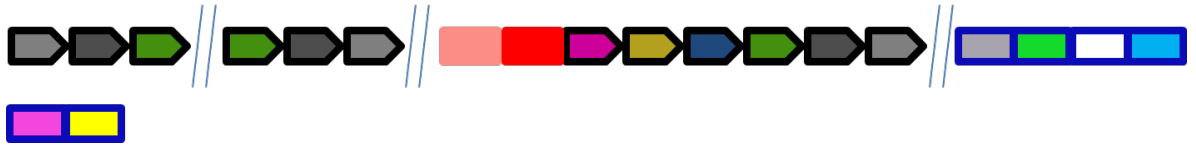

Megasphaera  
genomosp.  
type\_1 28L

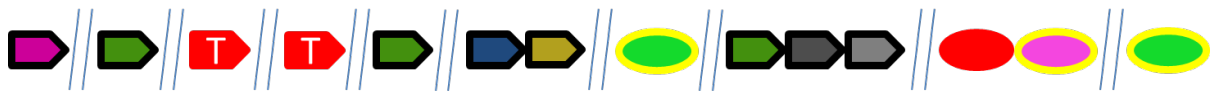

Megasphaera  
genomosp. UPII  
199-6

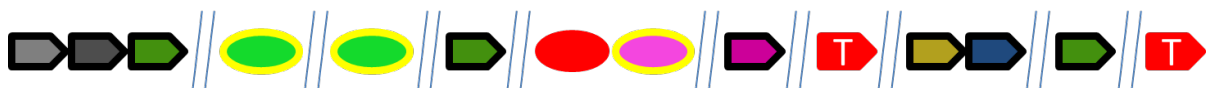

Megasphaera  
micronuciformis  
F0359

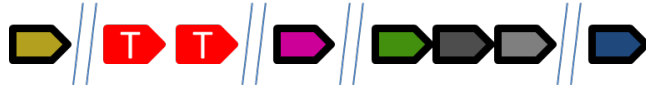

Micromonospora  
aurantiaca  
ATCC 27029

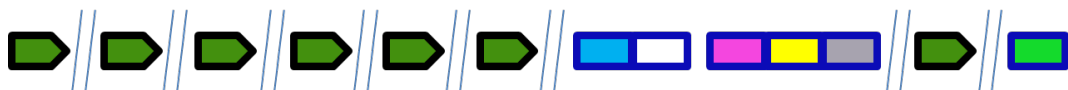

Micromonospora  
sp. L5

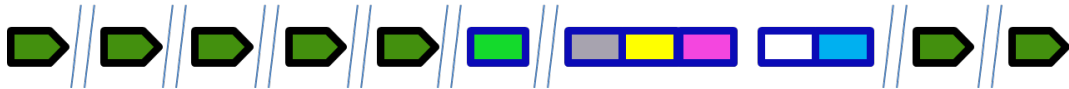

Myxococcus  
fulvus HW-1

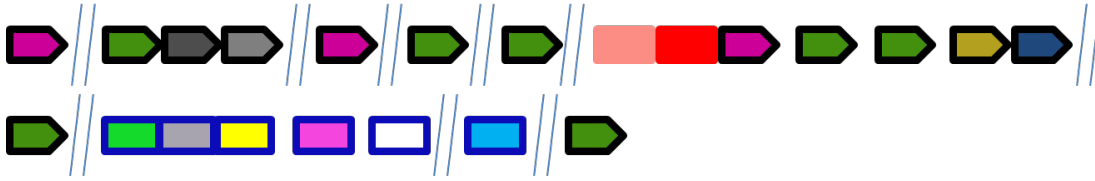

Myxococcus  
xanthus DK 1622

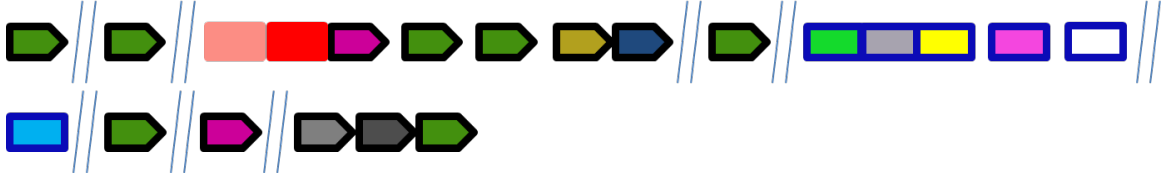

Natranaerobius  
thermophilus JW/  
NM-WN-LF

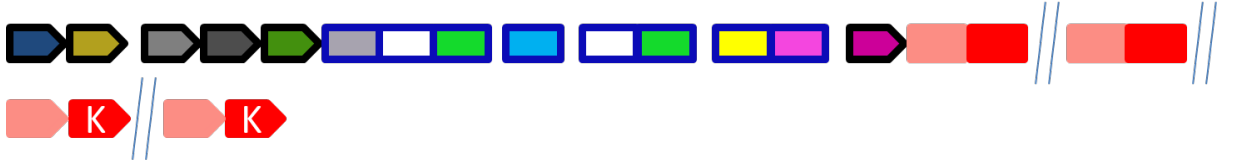

Nocardioideae  
bacterium  
Broad-1

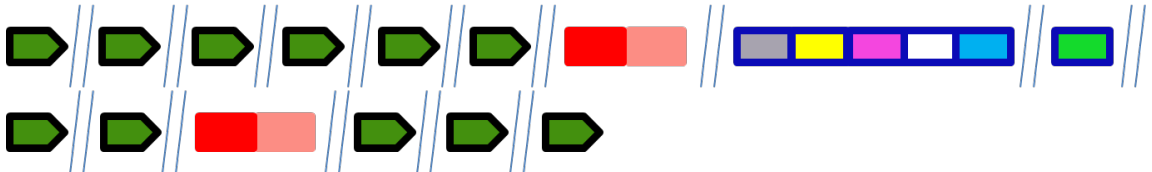

Nocardioides sp.  
JS614

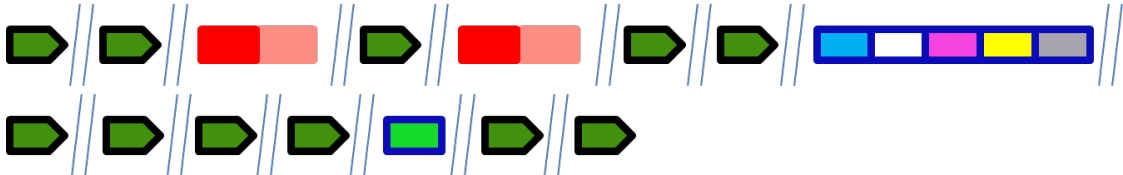

Odoribacter  
splanchnicus  
1651/6  
DSM 20712

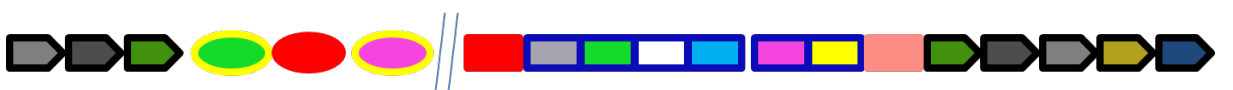

Peptoniphilus  
duerdenii  
ATCC BAA-1640

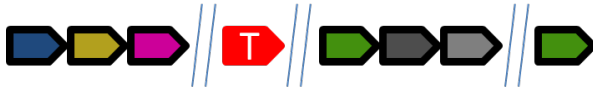

Peptoniphilus  
harei ACS-146-V-  
Sch2b

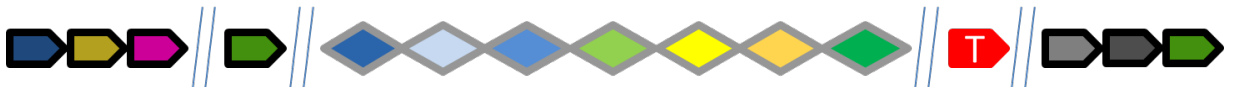

Peptoniphilus  
lacrimalis 315-B

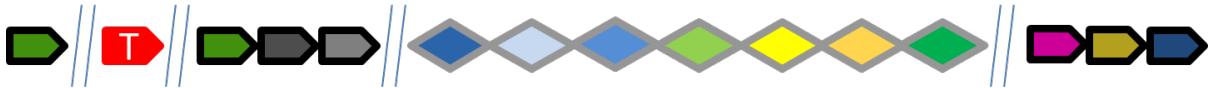

Peptoniphilus sp.  
F0131

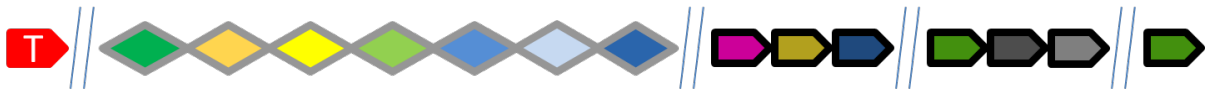

Peptoniphilus  
sp. F0141

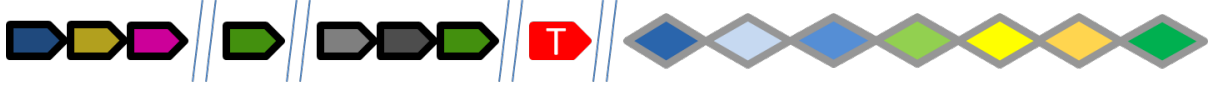

Petrotoga  
mobilis SJ95

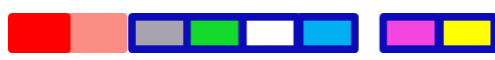

Porphyromonas  
asaccharolytica  
PR426713P-I

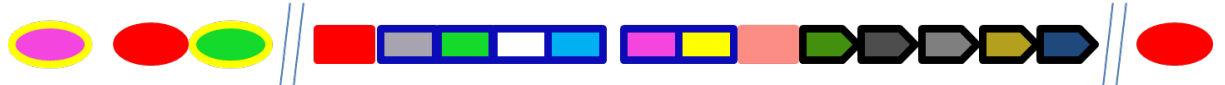

Porphyromonas  
endodontalis  
ATCC 35406

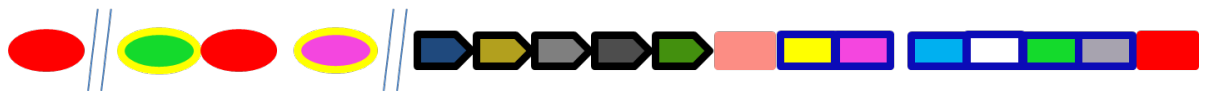

Porphyromonas  
gingivalis  
• ATCC 33277  
• W83

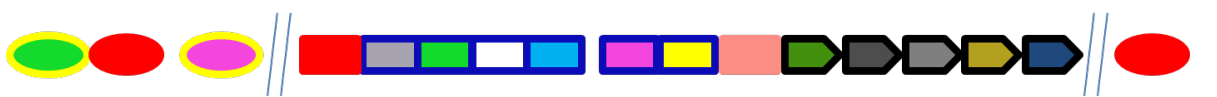

Porphyromonas  
gingivalis TDC60

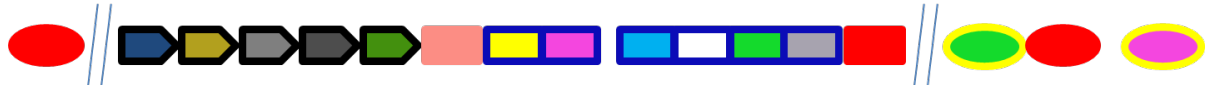

Porphyromonas  
uenonis 60-3

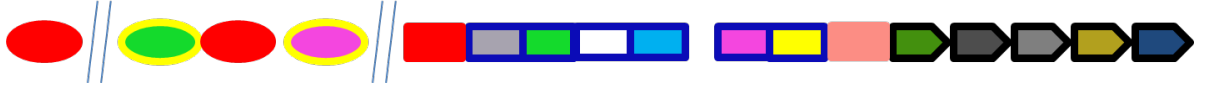

Propionibacterium  
acidifaciens  
F0233

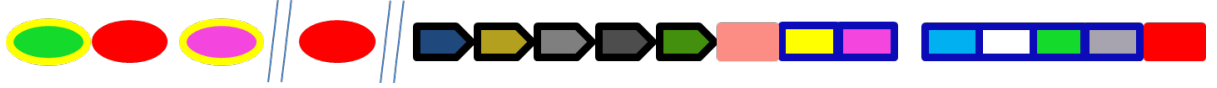

Pseudoramibacter  
alactolyticus  
ATCC 23263

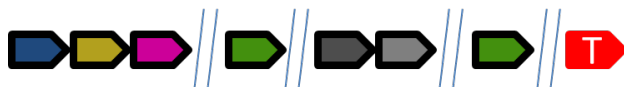

Rhodoferrax  
ferrireducens  
T118

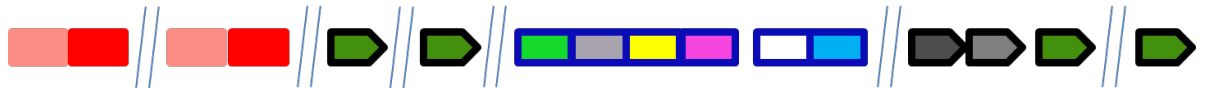

Roseburia  
intestinalis  
L1-82

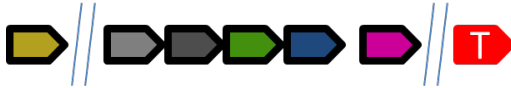

Roseburia  
intestinalis  
M50/1

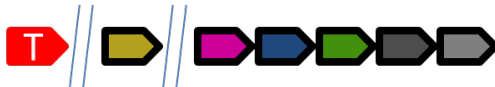

Roseburia  
intestinalis  
XB6B4

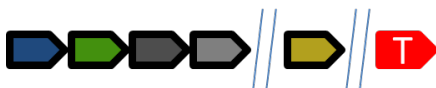



Roseburia  
inulinivorans  
DSM 16841

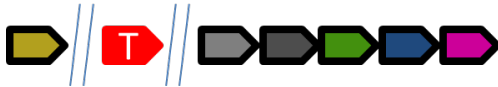

Ruminococcaceae  
bacterium D16

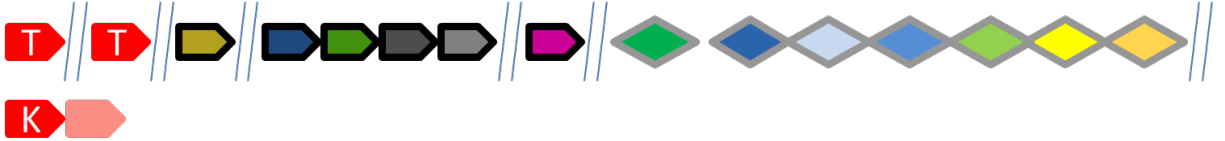

Salinispora  
arenicola  
CNS-205

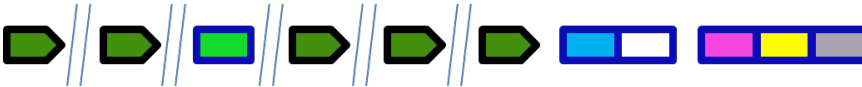

Salinispora  
tropica CNB-440

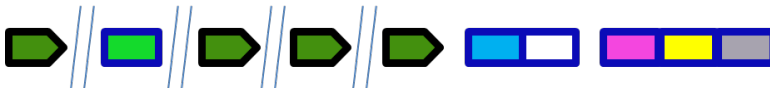

Shuttleworthia  
satelles DSM  
14600

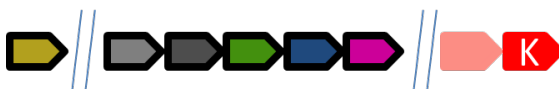

Sorangium  
cellulosum  
So ce 56

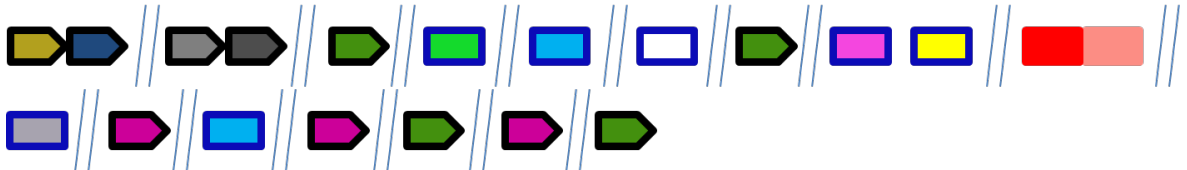

Stackebrandtia  
nassauensis  
LLR-40K-21  
DSM 44728

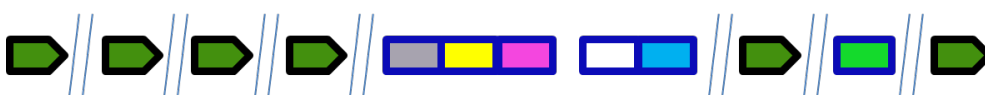

Stigmatella  
aurantiaca  
DW4/3-1 (1)

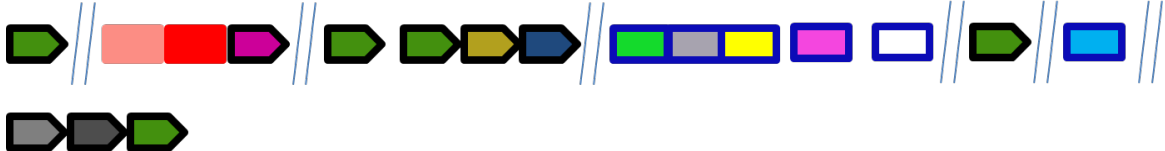

Stigmatella  
aurantiaca  
DW4/3-1 (2)

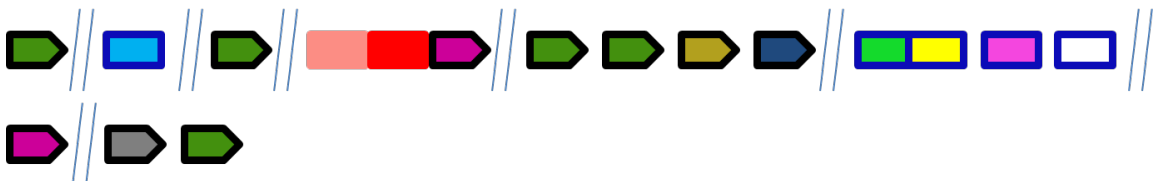

Subdoligranulum  
variabile  
DSM 15176

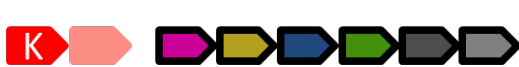

Symbiobacterium  
thermophilum  
14863

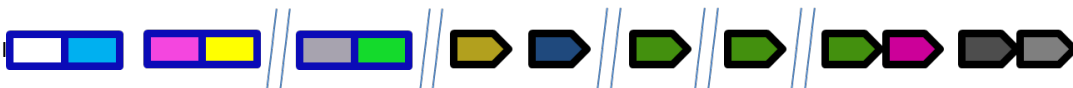

Syntrophobacter  
fumaroxidans  
MPOB

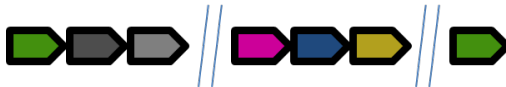

Syntrophomonas  
wolfei  
Goettingen,  
DSM 2245B

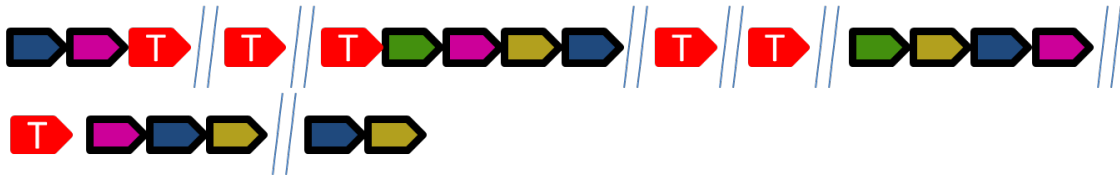

Syntrophothermus  
lipocalidus  
DSM 12680

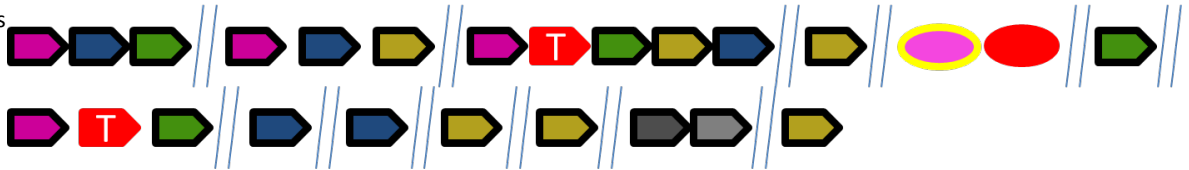

Thermoanaerob  
acter  
tengcongensis  
MB4T

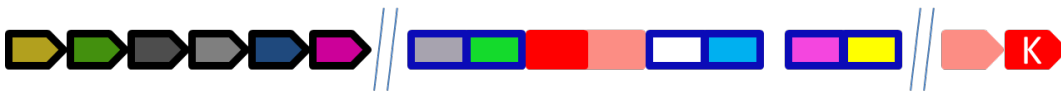

Thermoanaeroba  
acter wiegellii  
Rt8.B1

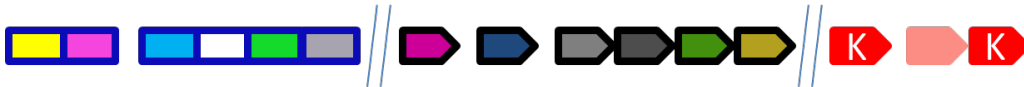

Thermoanaerob  
acterium  
thermosaccharo  
lyticum  
DSM 571

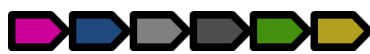

Thermomonospo  
ra curvata  
DSM 43183

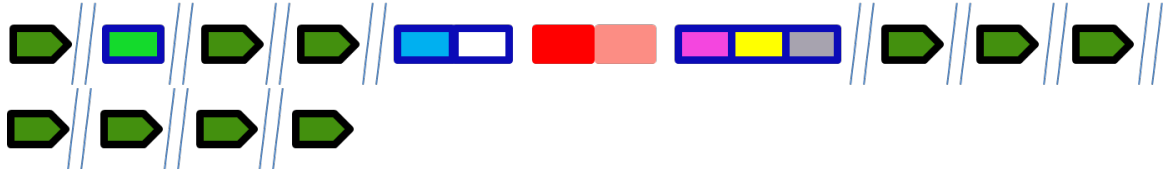

Thermosinus  
carboxydivorans  
Nor1

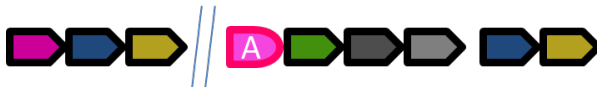

Thermosipho  
africanus TCF52B

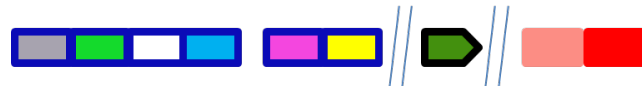

Thermosipho  
melanesiensis  
BI429

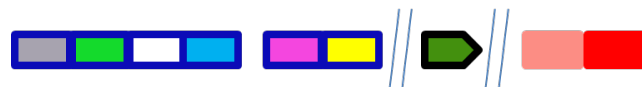

Thermotoga  
lettingae TMO

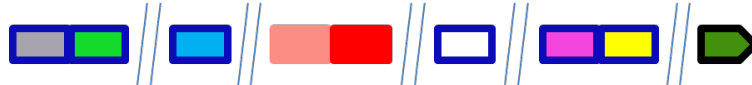

Thermotogales  
sp. mesG1.Ag.4.2

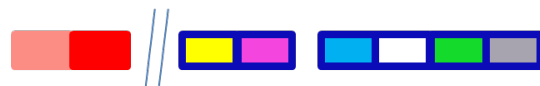

Treponema  
phagedenis  
F0421

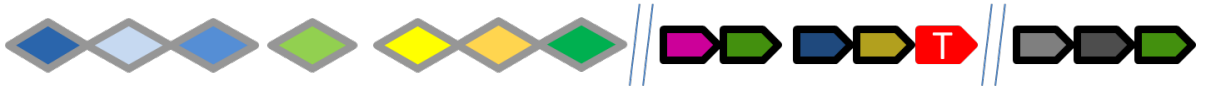

Treponema  
vincentii  
ATCC 35580

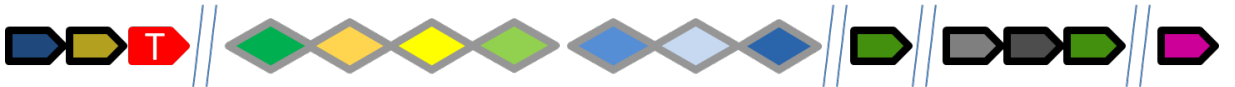

Verrucosipora  
maris  
AB-18-032

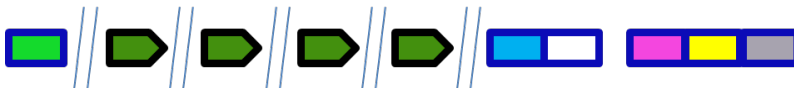

### Acetyl-CoA Pathway

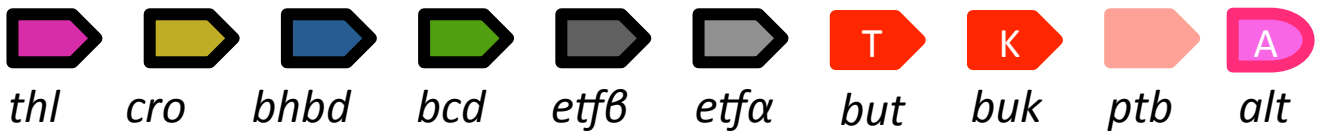

### Glutarate Pathway

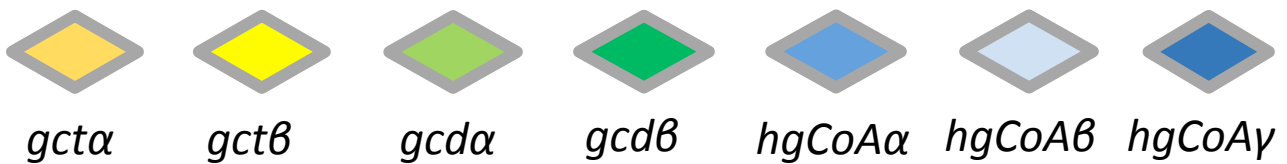

### 4-Aminobutyrate Pathway

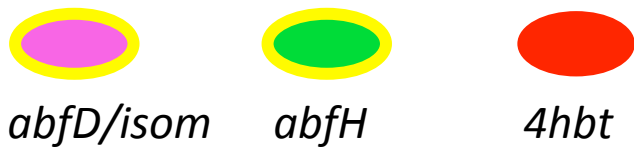

### Lysine Pathway

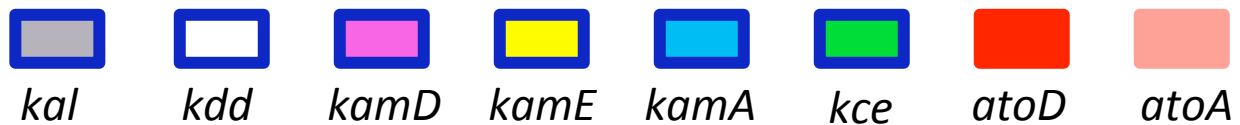

Supplement: mbo002141784sf04.pdf [file mbo002141784sf04.pdf]
