# Supplementary material for: Revealing the Bacterial Butyrate Synthesis Pathways by Analyzing (Meta)genomic Data
Source: PubMed Central journal article supplement — mBio. 2014 Apr 22;5(2):e00889-14. doi: 10.1128/mBio.00889-14 (PMC3994512; doi:10.1128/mbio.00889-14), 2014-04-22
Supplement: mbo002141784sd2.pdf [file mbo002141784sd2.pdf]

Acetyl-CoA pathway

Thl

|    |    |     |    |    |    |      |    |    |    |    |     |    |      |    |     |     |     |    |     |     |     |     |     |     |    |    |    |    |     |    |    |    |    |    |    |    |     |    |    |    |    |    |
|----|----|-----|----|----|----|------|----|----|----|----|-----|----|------|----|-----|-----|-----|----|-----|-----|-----|-----|-----|-----|----|----|----|----|-----|----|----|----|----|----|----|----|-----|----|----|----|----|----|
| M  | R  | E   | V  | V  | I  | A    | S  | A  | V  | R  | T   | A  | I    | G  | S   | A   | -   | -  | F   | G   | G   | A   | L   | K   | D  | V  | P  | A  | V   | D  | L  | G  | A  | I  | V  | I  | K   | E  | A  |    |    |    |
| 68 | 40 | 40  | 76 | 79 | 71 | 47   | 59 | 88 | 31 | 99 | 92  | 63 | 57   | 99 | 49  | 1   | 0   | 0  | 73  | 77  | 97  | 33  | 86  | 50  | 34 | 61 | 38 | 79 | 39  | 43 | 94 | 90 | 58 | 39 | 66 | 61 | 82  | 68 | 79 |    |    |    |
|    | L  | K   | R  | A  | -  | P    | G  | V  | K  | P  | -   | A  | -    | -  | -   | -   | -   | -  | -   | -   | P   | -   | -   | L   | K  | -  | -  | G  | -   | -  | -  | L  | E  | -  | K  | -  | -   | -  | -  |    |    |    |
|    | 59 | 38  | 74 | 77 | 0  | 2    | 59 | 52 | 39 | 80 | 0   | 1  | 0    | 0  | 0   | 0   | 0   | 0  | 0   | 0   | 1   | 0   | 0   | 1   | 1  | 0  | 0  | 1  | 0   | 0  | 0  | 1  | 1  | 0  | 1  | 0  | 1   | 0  | 0  | 0  |    |    |
|    | D  | -   | -  | -  | A  | -    | E  | Q  | V  | D  | E   | V  | I    | M  | G   | N   | V   | L  | Q   | A   | G   | E   | L   | G   | Q  | N  | V  | A  | R   | Q  | A  | A  | I  | K  | A  | G  | I   | P  | V  |    |    |    |
|    | 1  | 0   | 0  | 0  | 1  | 0    | 52 | 25 | 67 | 77 | 77  | 82 | 48   | 50 | 100 | 52  | 93  | 58 | 66  | 84  | 84  | 2   | 55  | 85  | 89 | 70 | 36 | 75 | 100 | 89 | 51 | 48 | 35 | 47 | 90 | 98 | 50  | 96 | 39 |    |    |    |
|    | E  | V   | P  | A  | M  | T    | I  | N  | K  | V  | C   | G  | S    | G  | L   | R   | A   | V  | S   | L   | A   | A   | Q   | M   | I  | K  | A  | G  | D   | A  | D  | I  | V  | V  | A  | G  | G   | M  | E  |    |    |    |
|    | 74 | 59  | 82 | 74 | 28 | 81   | 50 | 98 | 47 | 77 | 100 | 91 | 100  | 96 | 83  | 44  | 41  | 78 | 34  | 50  | 84  | 71  | 60  | 33  | 93 | 39 | 53 | 96 | 65  | 70 | 75 | 57 | 65 | 59 | 82 | 98 | 100 | 48 | 99 |    |    |    |
|    | N  | M   | S  | M  | A  | P    | Y  | L  | L  | P  | G   | K  | A    | R  | W   | G   | Y   | R  | M   | G   | A   | P   | D   | G   | -  | D  | G  | K  | -   | L  | V  | D  | T  | M  | I  | K  | D   | G  | L  |    |    |    |
|    | 57 | 100 | 90 | 21 | 73 | 90   | 74 | 30 | 61 | 47 | 13  | 29 | 63   | 98 | 38  | 98  | 34  | 80 | 90  | 70  | 2   | 5   | 14  | 2   | 0  | 33 | 42 | 36 | 0   | 27 | 59 | 94 | 25 | 92 | 52 | 27 | 91  | 56 | 97 |    |    |    |
|    | W  | D   | A  | F  | -  | [AL] | L  | -  | -  | -  | -   | -  | -    | -  | -   | -   | -   | -  | -   | -   | -   | -   | -   | -   | -  | -  | -  | L  | N   | F  | N  | Y  | H  | M  | G  | I  | T   | A  | E  | N  | I  |    |
|    | 45 | 80  | 59 | 67 | 0  | 1    | 1  | 0  | 0  | 0  | 0   | 0  | 0    | 0  | 0   | 0   | 0   | 0  | 0   | 0   | 0   | 0   | 0   | 0   | 0  | 0  | 0  | 0  | 1   | 61 | 2  | 34 | 64 | 92 | 99 | 86 | 62  | 86 | 93 | 93 | 82 | 57 |
|    | A  | E   | K  | D  | Q  | Y    | Q  | K  | K  | Y  | G   | Y  | W    | G  | I   | T   | R   | E  | E   | Q   | D   | E   | F   | A   | L  | A  | S  | Q  | Q   | K  | A  | E  | A  | A  | I  | K  | E   | G  | R  |    |    |    |
|    | 78 | 62  | 36 | 5  | 3  | 2    | 2  | 2  | 2  | 2  | 2   | 43 | 59   | 60 | 71  | 96  | 85  | 56 | 75  | 100 | 62  | 69  | 74  | 36  | 27 | 99 | 83 | 41 | 67  | 90 | 41 | 47 | 99 | 39 | 39 | 30 | 98  | 40 |    |    |    |    |
|    | F  | K   | D  | E  | I  | V    | P  | V  | V  | I  | K   | G  | K    | V  | F   | -   | -   | -  | -   | -   | -   | K   | G   | E   | P  | V  | V  | V  | F   | D  | T  | D  | E  | F  | P  | R  | -   | -  | -  |    |    |    |
|    | 96 | 66  | 64 | 98 | 96 | 89   | 96 | 92 | 37 | 59 | 61  | 26 | 49   | 1  | 1   | 0   | 0   | 0  | 0   | 0   | 0   | 82  | 74  | 39  | 19 | 30 | 13 | 48 | 54  | 70 | 58 | 99 | 98 | 25 | 82 | 66 | 0   | 0  | 0  |    |    |    |
|    | F  | G   | T  | T  | A  | E    | K  | L  | A  | K  | L   | K  | P    | A  | F   | K   | -   | K  | -   | S   | -   | V   | T   | G   | K  | D  | D  | G  | -   | -  | -  | -  | -  | -  | -  | E  | -   | V  | -  |    |    |    |
|    | 26 | 63  | 61 | 73 | 24 | 90   | 34 | 82 | 57 | 78 | 99  | 52 | 86   | 74 | 92  | 69  | 0   | 82 | 0   | 1   | 0   | 1   | 1   | 1   | 1  | 1  | 8  | 63 | 95  | 0  | 0  | 0  | 0  | 0  | 0  | 0  | 1   | 0  | 1  | 0  |    |    |
|    | -  | -   | -  | -  | -  | -    | -  | -  | -  | -  | -   | -  | -    | -  | -   | -   | T   | G  | T   | V   | T   | A   | G   | N   | A  | S  | G  | I  | N   | D  | G  | A  | A  | A  | L  | V  | V   | M  | S  | E  |    |    |
|    | 0  | 0   | 0  | 0  | 0  | 0    | 0  | 0  | 0  | 0  | 0   | 0  | 0    | 0  | 0   | 1   | 17  | 62 | 91  | 97  | 99  | 84  | 96  | 89  | 96 | 80 | 80 | 94 | 100 | 92 | 97 | 79 | 63 | 52 | 70 | 49 | 75  | 83 | 46 |    |    |    |
|    | E  | -   | K  | A  | K  | E    | L  | G  | L  | K  | P   | -  | L    | A  | T   | I   | V   | S  | Y   | G   | S   | A   | G   | V   | D  | P  | K  | I  | M   | G  | Y  | G  | P  | V  | P  | A  | T   | K  | K  |    |    |    |
|    | 70 | 0   | 73 | 80 | 55 | 67   | 73 | 83 | 34 | 57 | 93  | 0  | 63   | 75 | 34  | 60  | 64  | 45 | 51  | 49  | 31  | 34  | 87  | 69  | 75 | 97 | 25 | 64 | 86  | 86 | 30 | 86 | 97 | 49 | 41 | 79 | 55  | 47 | 72 |    |    |    |
|    | A  | L   | E  | K  | -  | A    | G  | L  | T  | I  | E   | D  | [IL] | D  | L   | I   | E   | A  | N   | E   | A   | F   | A   | A   | Q  | S  | L  | A  | V   | A  | K  | D  | L  | C  | E  | E  | H   | G  | V  |    |    |    |
|    | 64 | 77  | 41 | 60 | 0  | 64   | 58 | 67 | 42 | 37 | 27  | 91 | 28   | 84 | 93  | 64  | 100 | 61 | 100 | 100 | 100 | 98  | 98  | 80  | 86 | 68 | 58 | 70 | 81  | 36 | 46 | 42 | 93 | 6  | 5  | 9  | 10  | 14 | 8  |    |    |    |
|    | T  | P   | G  | F  | D  | -    | -  | M  | E  | K  | K   | V  | N    | V  | N   | G   | G   | A  | I   | A   | L   | G   | H   | P   | V  | G  | A  | S  | G   | A  | R  | I  | L  | V  | T  | L  | L   | Y  | E  |    |    |    |
|    | 8  | 4   | 42 | 46 | 66 | 0    | 0  | 44 | 27 | 67 | 7   | 67 | 100  | 91 | 88  | 100 | 94  | 93 | 87  | 92  | 74  | 100 | 100 | 100 | 50 | 98 | 76 | 93 | 99  | 64 | 98 | 89 | 73 | 61 | 88 | 96 | 71  | 45 | 81 |    |    |    |
|    | M  | K   | K  | R  | D  | D    | A  | K  | K  | G  | L   | A  | T    | L  | C   | I   | G   | G  | G   | M   | G   | T   | A   | L   | I  | V  | E  | R  |     |    |    |    |    |    |    |    |     |    |    |    |    |    |
|    | 80 | 34  | 54 | 82 | 39 | 10   | 48 | 62 | 28 | 98 | 86  | 93 | 73   | 91 | 100 | 89  | 100 | 95 | 96  | 62  | 90  | 47  | 77  | 36  | 68 | 72 | 68 | 63 |     |    |    |    |    |    |    |    |     |    |    |    |    |    |

Hbd

|    |    |     |     |    |     |    |     |    |     |    |    |    |     |    |    |    |    |    |    |    |    |     |     |    |     |     |    |     |     |    |    |    |     |     |     |     |     |    |     |
|----|----|-----|-----|----|-----|----|-----|----|-----|----|----|----|-----|----|----|----|----|----|----|----|----|-----|-----|----|-----|-----|----|-----|-----|----|----|----|-----|-----|-----|-----|-----|----|-----|
| M  | K  | V   | G   | V  | I   | G  | A   | G  | T   | M  | G  | S  | G   | I  | A  | Q  | A  | F  | A  | Q  | A  | E   | G   | Y  | E   | E   | V  | V   | L   | C  | D  | I  | K   | E   | E   | F   | A   | E  | K   |
| 56 | 84 | 52  | 45  | 76 | 61  | 99 | 73  | 99 | 73  | 99 | 98 | 44 | 99  | 99 | 69 | 73 | 45 | 66 | 94 | 56 | 20 | 21  | 87  | 42 | 1   | 52  | 96 | 37  | 67  | 31 | 81 | 71 | 40  | 25  | 69  | 57  | 35  | 26 | 34  |
|    | G  | K   | A   | K  | I   | A  | K   | G  | L   | E  | K  | L  | V   | A  | K  | G  | K  | M  | T  | E  | E  | E   | K   | D  | A   | I   | L  | A   | R   | I  | T  | T  | T   | T   | D   | L   | E   | D  | I   |
|    | 72 | 31  | 33  | 40 | 84  | 24 | 87  | 38 | 61  | 23 | 70 | 40 | 81  | 29 | 91 | 86 | 81 | 60 | 43 | 40 | 40 | 25  | 48  | 39 | 36  | 56  | 65 | 30  | 40  | 79 | 46 | 31 | 45  | 45  | 33  | 27  | 20  | 56 | 17  |
|    | A  | C   | A   | D  | C   | D  | L   | V  | I   | E  | A  | A  | I   | E  | N  | M  | E  | I  | K  | K  | Q  | I   | F   | K  | E   | L   | D  | E   | N   | I  | I  | C  | K   | P   | E   | T   | I   | L  | A   |
|    | 7  | 30  | 43  | 79 | 55  | 93 | 82  | 56 | 53  | 99 | 96 | 63 | 25  | 99 | 56 | 73 | 49 | 54 | 99 | 72 | 28 | 47  | 93  | 38 | 55  | 95  | 83 | 34  | 1   | 1  | 66 | 69 | 69  | 51  | 50  | 38  | 88  | 53 | 95  |
|    | S  | N   | T   | S  | S   | L  | S   | I  | T   | E  | I  | A  | A   | G  | T  | K  | R  | P  | D  | K  | V  | I   | G   | M  | H   | F   | F  | N   | P   | A  | P  | V  | M   | K   | L   | V   | E   | V  | I   |
|    | 50 | 99  | 99  | 99 | 95  | 88 | 87  | 95 | 98  | 66 | 72 | 62 | 42  | 32 | 65 | 41 | 93 | 86 | 41 | 43 | 76 | 87  | 99  | 95 | 100 | 100 | 85 | 100 | 100 | 57 | 80 | 67 | 100 | 90  | 100 | 78  | 100 | 76 | 96  |
|    | R  | G   | L   | A  | T   | S  | D   | E  | T   | F  | D  | K  | I   | K  | E  | L  | S  | E  | E  | I  | G  | K   | T   | P  | V   | E   | V  | -   | N   | E  | A  | P  | G   | F   | V   | V   | N   | R  | I   |
|    | 35 | 96  | 33  | 38 | 99  | 58 | 28  | 79 | 70  | 31 | 40 | 31 | 52  | 41 | 47 | 42 | 61 | 35 | 26 | 59 | 80 | 100 | 47  | 84 | 87  | 39  | 84 | 0   | 23  | 80 | 63 | 80 | 99  | 100 | 83  | 91  | 100 | 96 | 80  |
|    | L  | I   | P   | M  | I   | N  | E   | A  | I   | G  | I  | Y  | A   | E  | G  | V  | A  | S  | V  | E  | D  | I   | D   | T  | A   | M   | K  | L   | G   | A  | N  | H  | P   | M   | G   | P   | L   | A  | L   |
|    | 96 | 80  | 97  | 94 | 90  | 99 | 99  | 89 | 41  | 54 | 64 | 44 | 55  | 69 | 97 | 48 | 84 | 60 | 42 | 88 | 56 | 98  | 100 | 37 | 76  | 93  | 88 | 96  | 100 | 80 | 94 | 89 | 100 | 80  | 100 | 100 | 98  | 70 | 100 |
|    | G  | D   | L   | I  | G   | L  | D   | V  | C   | L  | A  | I  | M   | D  | V  | L  | Y  | N  | -  | E  | T  | G   | D   | S  | K   | Y   | R  | P   | H   | P  | L  | L  | R   | K   | M   | V   | R   | A  | G   |
|    | 58 | 100 | 72  | 92 | 100 | 82 | 100 | 56 | 64  | 97 | 88 | 92 | 87  | 43 | 88 | 96 | 64 | 20 | 0  | 83 | 43 | 85  | 98  | 50 | 99  | 99  | 98 | 65  | 52  | 68 | 96 | 91 | 63  | 84  | 67  | 99  | 79  | 62 | 76  |
|    | W  | L   | G   | R  | K   | T  | G   | K  | G   | F  | Y  | D  | Y   | S  | K  |    |    |    |    |    |    |     |     |    |     |     |    |     |     |    |    |    |     |     |     |     |     |    |     |
|    | 23 | 93  | 100 | 60 | 100 | 64 | 89  | 56 | 100 | 96 | 88 | 48 | 100 | 28 | 49 |    |    |    |    |    |    |     |     |    |     |     |    |     |     |    |    |    |     |     |     |     |     |    |     |

Cro

M E [MY] E N V L - L [DE] E [DE] [IY] K E G G I A I V T I N R P K A L N A L N S E V L K E L  
 50 37 30 28 56 42 27 0 35 1 60 1 1 34 41 49 20 64 53 37 37 74 73 67 95 87 67 73 95 100 97 91 87 50 43 50 90 25 80 78

D A A F D E I E N - - - D D D I R V V I L T G A G E K - - - - - K G N E F K A  
 26 18 40 37 39 25 57 34 23 0 0 0 53 20 27 41 38 59 63 73 58 95 100 48 94 42 3 0 0 0 0 0 3 3 3 3 3 93 50

F V A G A D I A E M K D L T - A A E G R A F G K L G N K V F R K I E T L P K P  
 100 90 100 100 99 100 99 38 73 99 38 34 45 41 0 26 20 74 56 39 32 87 58 25 52 86 42 24 52 78 52 53 65 90 32 37 43 46 82

V I A A V N G F A L G G G C E L A M A C D I R I A S E N A K F G Q P E V G L G  
 76 97 99 94 69 93 100 80 95 99 100 100 100 83 100 69 67 78 54 98 100 73 88 70 75 87 48 44 97 56 92 90 90 100 100 85 67 99 100

I T P G F G G T Q R L A R L V G M G K A K E L I Y T G D N I K A D E A L R I G  
 90 61 97 98 90 90 100 99 99 96 99 42 97 71 72 96 20 70 42 98 90 84 69 79 56 82 42 32 32 86 51 93 37 78 99 40 52 77 99

L V N K V V P P - - - - - - - - - - - E - E L M - E E A K K L A K K I A S  
 94 90 87 39 92 54 43 33 0 0 0 0 0 0 0 0 0 0 0 0 0 0 0 0 63 0 49 97 52 0 40 43 69 35 49 53 96 23 58 91 67 33

N A P I A V R Y A K K A I N R G L Q V D I D T A I A I E A K L F G L C F A T E  
 53 61 61 35 90 81 50 26 38 100 25 87 83 73 28 96 31 39 27 78 53 48 34 57 40 21 46 100 35 26 51 97 73 33 72 93 41 83 58

D Q K E G M T A F L E K R K G E P N F K N [KV] P F K N K  
 97 84 67 79 94 97 22 90 99 69 80 87 77 68 6 14 26 32 9 9 7 4 5 75 31 46 50

But

M D [FY] [KS] E E Y K Q K L V T A E E A A V K V V K S G D W V D Y G W C T G T P V A L  
 73 49 35 19 25 49 99 39 33 98 82 40 61 71 35 64 100 4 50 51 39 83 86 83 96 96 77 71 76 89 81 60 35 29 39 48 69 39 46 55

D K A L A K R K D E - - E L K D V K I R G G I L L K W P P I E I F K I D P P G  
 100 46 90 92 98 45 92 23 40 2 0 0 76 99 26 70 74 48 49 85 70 71 48 40 30 2 33 39 57 8 49 48 48 38 31 56 38 29 29

E H F T W N S W H M S G I E R K L I D Q N - G D F A F Y S P I R Y S E L P R Y  
 43 68 75 57 60 69 80 87 98 46 51 79 30 60 100 83 39 48 21 26 2 0 81 4 31 29 50 76 26 99 50 55 75 63 80 65 87 56 71

Y R E [NS] I D P G V D V A M F Q V A P M D E H G Y F N F G P S A S H L A A V C E  
 82 74 43 21 23 13 30 8 43 74 86 73 45 32 64 88 42 87 92 98 35 75 100 60 92 80 73 94 52 45 58 76 68 32 20 67 33 36 64

K A K K V I V E V N E N M P R C L G G F E I G S E C I H I S E V D Y I V E G D  
 36 77 52 26 62 88 68 99 87 98 57 62 63 100 50 61 68 98 79 25 58 4 4 8 39 19 50 86 81 74 31 88 82 51 81 79 95 80 30

N P P - I A E L [GP] A G G A A T E V D K K V A K L I V E E I P D G A C L Q L G I  
 70 51 60 0 42 32 45 45 37 33 40 33 32 40 52 54 58 95 40 42 60 99 33 58 69 68 39 58 76 61 55 99 71 68 76 92 93 100 88

G G M P N A V G S L I A E S D L K D L G V H T E M Y V D A F V D I A K A G K I  
 100 86 75 100 82 82 64 92 46 50 86 100 39 99 99 93 93 98 98 93 68 100 95 92 83 58 80 95 69 77 74 64 42 45 45 88 99 76 67

T G A K K N I D R G R Q V Y A F A A G T K K L Y D Y L D N N P E C M [HRV] S A P V  
 82 81 38 49 98 46 70 88 54 58 63 62 54 71 54 83 58 60 100 60 52 57 69 99 79 44 58 56 36 92 77 43 44 52 2 50 68 88 88

D Y T N D I R V I S A L D N F I S I N N A V D V D L F G Q V N A E S A G T K H  
 63 99 64 90 61 38 44 36 79 42 33 42 88 79 70 56 87 98 96 71 60 69 39 40 99 98 45 96 95 70 38 57 99 87 42 99 29 48 54

I S G A G G Q L D F V L G A Y L S K G G K S F I C L S S T F K N D K D G Q L [HK]  
 90 99 99 51 99 99 89 88 99 99 63 56 94 90 85 49 93 56 92 99 87 73 90 74 86 58 61 96 70 49 33 12 38 85 36 96 19 40 25

S R I V P T L T P G S I V T D T R A N T H Y V V T E Y G K V N L K G L S T W E  
 98 75 94 39 95 61 64 21 32 95 58 54 64 86 49 46 99 45 55 40 60 81 40 69 99 99 77 99 31 56 73 70 76 94 52 71 67 89 55

R A E A L I S I A H P D F R D E L I K E A E K M H I W R R S N K R  
 70 87 92 73 65 95 62 54 98 92 99 75 83 96 70 58 99 85 60 56 99 76 69 52 29 88 90 75 50 77 82 86 32

Ptb

M I K S F D E L L S K A K E R L K P E P K T V S V A V A Q D K E V L E A V K D A  
 69 35 69 43 89 30 59 51 44 23 41 56 67 34 18 2 2 2 38 44 58 39 47 64 95 95 58 84 64 94 48 33 89 97 57 96 70 46 23 98

K E L G I - A N A I L V G D K E K I K E I A K E I - G M D L E - - D Y E I I D  
 48 48 28 55 75 0 56 37 68 76 97 94 98 67 28 53 77 80 45 52 80 70 51 40 72 0 34 62 51 65 28 0 0 43 36 89 69 75 42

E K D P K E A A L K A V E L V S S G K A D M V M K G L V D T A T F L R A V L N  
 45 29 58 28 25 43 82 59 58 62 85 93 68 62 82 62 29 79 62 88 73 59 49 98 100 100 84 55 61 96 48 27 55 81 60 60 76 97 74

K E V G L R T G - K L L S H V A V F E V P L - S G Y D R L L F L T D A A F N T  
 88 91 45 100 97 96 86 91 0 38 39 57 99 76 62 69 90 68 71 38 46 4 0 4 39 39 48 62 96 64 52 37 93 100 37 71 47 88 29

Y P D L N Q K K D I I E N A V T V A H A I G I E N P K V A P I C A V E V V N P  
 47 100 37 78 30 28 99 39 38 86 49 31 98 73 62 36 67 72 60 60 36 82 53 54 35 99 93 82 98 32 45 52 96 63 100 51 95 80 90

K M P A T V D A A L L S K M N D R G Q I K - G C I V D G P L A L D N A I S E E  
 65 84 55 34 99 52 76 94 52 32 97 26 53 93 33 35 66 98 46 88 61 0 70 91 45 74 55 100 100 43 86 61 100 63 99 40 70 38 79

A A E H K - G A I K S P V A G D A D I L L F P N I E A G N I L Y K T L T Y F A  
 96 97 31 87 100 0 95 6 61 31 39 54 74 90 100 26 84 86 74 75 75 24 99 61 96 74 51 87 100 42 45 70 100 38 66 53 51 38 36

D K S K N A G L L V G A S A P V I L T S R A D S F E T K L N S I A L A A L V A  
 2 40 27 78 58 49 78 40 46 64 99 49 40 69 98 51 59 91 74 98 99 46 91 62 25 88 47 98 40 67 80 94 92 81 72 54 71 48 72

**Buk**  
 A Y K I L [IV] I N P G S T S T K I G V F E D E N E I L E E T L R H S S E E I K K Y  
 18 40 71 45 98 38 94 100 97 99 83 96 99 100 99 87 46 68 54 45 46 88 41 37 55 40 57 47 61 71 61 98 63 32 76 80 65 22 51 71

D T I F D Q F E F R K E V I L D V L K E K G V D I N E L D A V V G R G G L L K  
 23 37 61 39 76 84 41 38 58 100 71 33 48 91 45 30 32 93 53 72 52 48 31 54 37 50 38 79 63 88 57 94 90 100 98 100 74 78 75

P I E G G T Y [EK] V N D A M I E D L K I G V Q G E H A S N L G G I I A [KN] E I A K  
 82 65 36 82 100 89 97 16 92 43 35 38 85 46 75 92 84 67 34 68 54 51 94 41 100 95 96 96 98 100 76 60 58 88 29 38 85 44 42

E L N I P S F I V D P V V V D E L E D V A R I S G M P E I E R K S I F H A L N  
 54 42 52 45 73 53 62 77 95 99 96 96 56 88 100 99 40 34 75 55 82 98 64 79 100 45 73 66 66 36 87 33 100 29 50 99 96 100 99

Q K A V A R R Y A K E I G K K Y E D L N L I V A H M G G G I S V G A H K N G K  
 61 92 96 79 69 56 67 58 79 56 58 25 45 66 52 82 73 53 43 81 71 75 92 52 100 55 100 80 100 43 96 77 59 67 82 47 35 100 67

V V D V N N A L D G E G P F S P E R A G G L P V G D L V K L C [FY] S G K Y T Y E  
 40 53 95 79 62 79 71 58 59 63 55 100 91 98 94 92 94 100 43 98 64 68 87 48 71 44 93 53 57 46 88 50 92 81 80 94 67 29 32

E M K K K I S G K G G L V A Y L N T N D A R E V E E R I E E G D E K A K L I Y  
 90 39 46 69 86 54 27 81 55 99 99 38 54 71 88 85 46 94 71 97 38 69 60 61 54 28 50 51 50 44 98 79 44 59 79 49 82 61 29

D A F - I Y Q I A K E I G A M A A V L K G K V D A I I L T G G I A Y S K M V T  
 42 98 52 0 40 79 97 63 64 99 75 91 80 34 46 75 56 74 96 25 96 34 95 81 63 79 48 86 98 98 96 70 82 75 71 46 27 33 41

E G I K E R V S F I A P V E V Y P G E D E L L A L A Q G A L R V L N G E E E A  
 33 28 63 42 37 43 88 32 57 82 81 80 58 29 49 48 82 98 96 63 98 49 55 96 96 81 52 96 63 64 95 80 88 35 83 83 98 41 84

K I Y  
 72 30 95

**Glutrate pathway**

**Gcta**

M N Y S M P K Y F Q N M P Q V G K A L A N I D E A N E N A V [KR] E V E E A I A Q S  
 44 65 94 97 91 85 47 100 100 94 97 100 71 68 62 100 59 29 85 32 59 59 74 74 50 100 82 44 47 53 47 50 62 100 32 41 97 56 29 56

I Q A M Q D A G T T P D E K I [HN] E K G Q M T A L Q R I A E L V D E G T W C P L  
 82 29 50 44 53 53 62 100 62 15 65 79 97 82 62 44 47 65 88 85 65 85 100 79 56 100 59 74 74 100 65 91 79 100 97 94 50 100 100

N S L Y N P E D F E T G G T G I V K G L G R I G G K W A V V V A S D N K K I V  
 100 59 94 85 100 100 79 59 62 59 62 38 47 94 76 94 82 85 100 100 88 85 71 44 91 91 100 68 68 62 85 100 100 100 100 100 100 62 62

G A W V P G Q A D N L L R A S D T A K C L G I P L V Y V L N C S G V K L D E Q  
 100 94 100 85 97 100 100 88 65 91 100 91 100 79 100 100 91 100 91 62 94 59 82 100 100 91 100 56 100 100 100 94 100 100 82 79 85 79 100

E K V Y A N R R G G G T P F F R N A E L Q Q L G I P V I V G I Y G T N P A G G  
 85 97 100 100 59 100 100 100 100 100 100 100 100 68 100 100 68 88 100 59 100 82 100 71 100 100 100 100 100 100 97 100 100 100 100 100 100

G Y H S I S P T I L I A H K D A N M A V G G A G I V G G M N P K G Y I D M E G  
 100 100 100 100 100 100 100 100 97 94 94 100 100 68 82 100 100 100 100 100 100 100 97 100 100 65 82 100 100 97 100 100 100 82 94 100 50 100 71

A E Q I A E A T M A A S K K K V E V P G T V H V H Y D K T G F F R E V Y D D E  
 100 44 94 97 62 74 85 71 35 44 71 15 15 76 59 76 56 62 100 100 65 56 44 56 100 85 74 44 100 100 100 94 100 100 91 100 44 50 85

I G V I D G I K K Y M D Y L P A Y D L E F F R V D E P T E P A L D P N D L Y S  
 59 100 100 65 68 85 100 74 85 100 65 68 65 97 100 56 97 62 85 97 100 100 100 100 100 62 100 47 62 100 44 59 65 65 68 94 91 100 94

I I P M N Q K K I Y N I Y D V I G R L F D N S E F S E Y K K G Y G P E M V T G  
 85 59 97 88 100 76 100 62 32 100 65 76 100 79 76 100 68 100 100 82 100 79 100 94 94 71 100 100 100 100 100 100 100 97 100 50 88 100 100  
 L A K V D G L L V G V V A N A Q G L L M N Y P E Y K E - - K S V G I G G K L Y  
 56 100 100 100 68 100 100 97 100 100 82 76 97 100 44 97 100 94 97 82 76 100 100 100 100 53 74 0 0 56 59 76 97 88 100 100 100 100 100  
 R Q G L I K M N E F V T L C S R D R L P I V W L Q D T T G I D V G N P A E K A  
 100 100 100 100 74 100 100 56 100 100 100 100 100 100 59 100 100 82 79 100 82 65 100 82 100 100 100 56 100 100 100 100 100 71 44 100 100 56 100  
 E L L G L G Q S L I Y S I E N S H V P Q I E I T L R K G S A A A H Y V L G G P  
 100 100 100 100 100 100 100 100 100 100 100 100 100 62 94 100 50 59 100 82 44 97 76 100 50 100 97 85 62 100 100 100 100 100 100 97 100 100 100  
 Q G N N T N A F S L G T A A T E V Y V M N G E T A A S A M Y S R R L A K D K K  
 100 100 100 62 97 100 85 97 97 79 100 91 88 97 85 100 44 65 100 100 82 100 100 100 100 97 44 100 100 97 94 97 85 100 59 100 85 44 94  
 A G K D L Q P T I D K M N Q L I N E Y T A K S R P A Y C A K T G M V D E I V P  
 88 100 85 94 97 79 100 79 100 79 100 100 100 44 85 100 71 62 94 59 44 100 100 76 100 47 76 100 82 71 59 100 76 100 100 100 91 100 44  
 L Y D L R G Y I Q A F A N A V Y Q N P K S I C A F H Q M I L P R A I R E F E T  
 62 62 71 56 100 50 100 74 41 100 100 56 62 65 59 100 100 91 100 74 85 97 100 62 79 100 100 100 53 74 100 100 62 94 94 82 76 62 82  
 Y T K K K  
 53 53 85 74 9

Gctβ

M  
74

S F F S V L A E L L E A S G F A A L - - T W Q N I A M I L V S F I L F Y L A I  
 31 86 57 31 49 83 31 54 49 71 46 46 97 97 97 71 86 89 0 0 89 89 80 77 37 43 100 57 51 63 86 86 49 97 43 100 91 97 100  
 V K K F E P L L L L P I A F G M F L V N L P L A G L M D E G G [EV] A D P W Y A S  
 69 100 46 91 100 100 97 100 100 83 100 97 51 100 100 77 74 100 49 100 91 97 86 83 71 89 86 46 80 40 6 6 29 23 43 43 34 17 26  
 G V L R I M Y Y G V - K S N L F P C L I F M G V G A M T D F G P L I A N P I S  
 97 83 46 34 77 63 49 43 97 71 0 91 83 74 83 94 100 86 97 54 100 86 89 77 100 94 100 97 100 100 57 100 100 94 97 100 100 77 91  
 L L L G A A A Q L G I Y V A F I F A T Q I G - - - - - F F T P A E A A A I  
 94 80 97 100 89 100 97 100 49 100 94 89 60 80 89 51 57 100 43 43 43 83 0 0 0 0 0 0 0 14 100 69 57 46 74 97 97 83 100  
 G I I G G A D G P T S I Y I A N N L A - P H L L A P I A V A A Y S Y M A L I P  
 77 97 100 100 97 100 100 100 100 69 100 83 60 83 77 83 94 94 0 91 57 94 83 86 89 100 100 97 100 100 100 100 100 94 100 89 100  
 L I Q P P I M K A L T T K K E R A V K M G Q - L R K V S K T E K I V F P I A V  
 69 100 100 100 97 94 97 86 57 91 100 94 74 89 94 100 69 66 83 100 46 86 0 97 97 83 89 94 91 57 97 97 69 83 100 100 69 46 77  
 V L F T S L L L P S V A P L L G [LM] L M L G N L F R E S G V V Q R L S D T A Q N  
 83 80 94 63 66 97 94 94 100 83 91 89 91 100 86 100 49 100 100 86 100 100 83 97 57 100 86 100 86 80 60 94 100 97 91 100 97 97 97  
 A L I N I V T I M L G L S V G A T A N G [AE] T F L D V S T L K I I A M G L A A F  
 94 74 63 97 94 51 97 97 91 100 94 57 49 91 97 89 51 89 34 86 34 46 100 97 43 31 43 100 63 49 100 89 54 74 100 100 46 100 100  
 C F S T A G G V L L G K L L Y I I T G G K I N P L I G S A G V S A V P M A A R  
 80 69 77 97 49 94 100 89 80 74 97 97 69 89 77 29 43 91 91 97 100 86 100 100 97 97 100 97 100 100 97 100 100 97 100 100 97 100 100  
 V S Q T V G A K E N P T N F L L M H A M G P N V A G V I G S A V A A G F F M M  
 100 89 97 71 83 100 63 74 77 89 94 91 100 94 100 100 100 100 97 100 97 100 100 97 100 97 97 97 91 100 100 100 97 100 63 89 77 43  
 I F K  
 66 89 60

HgCoAdα

M  
79

G I D V G S T A S K C [IV] I L K D G K E I V A K S V I S V G T G T S G P A R A [IM]  
 100 74 100 85 100 100 100 97 100 100 88 50 85 94 94 94 100 97 91 97 88 82 79 76 62 82 59 100 100 71 100 100 97 100 100 79 100 88 50  
 K E A L E Q A G L S S V E E L Q G A V A T G Y G R N S L A D G E V P A Q M S E  
 71 71 59 100 76 47 41 74 53 47 59 50 41 41 71 44 59 62 59 100 100 100 100 100 100 88 91 100 44 6 21 74 62 62 53 100 100 100 100  
 L S C H A K G A Y F L F P N V H T I I D I G G Q D S K A L K I G D N G M L E N  
 100 100 100 100 100 91 100 100 79 100 94 94 100 71 100 71 56 76 100 100 100 100 100 100 100 65 100 76 94 76 79 71 71 91 100 71 76 76 100  
 F V M N D K C A A G T G R F L D V I A K V L E V N L E D L E K L D E K S T V D  
 100 79 100 100 100 100 100 100 100 100 100 100 100 100 100 100 76 100 74 97 100 97 94 44 65 56 88 100 65 59 100 79 65 65 97 79 50 65  
 V A I S S T C T V F A E S E V I S Q L A K G T K I E D I V K G I H T A I A S R

91 59 100 100 100 100 100 100 100 100 100 100 100 100 100 100 100 100 100 100 91 59 97 91 74 74 71 100 100 76 65 100 100 100 62 71 76 100 79 100  
V G S L A K R I G I K D D V V M T G G V A L N K G M V R A L E R N L G F K I H  
100 76 76 100 97 76 100 59 100 65 59 76 82 88 88 91 100 100 100 100 100 76 100 62 100 76 91 76 100 94 79 53 71 68 100 65 76 68 71

T S E Y C Q L N G A I G A A L F A Y Q K Y M M T H Q  
91 56 65 65 76 100 76 100 100 100 59 100 100 100 100 85 88 91 94 82 56 32 44 44 44 44

HgCoAdβ

M A G K M E K L P N K K P R P I E G H K P A A A I L R G V V D K V Y A N A W E A  
53 53 56 65 56 74 76 65 76 65 76 53 76 76 74 74 71 76 76 74 97 76 74 71 50 100 100 65 100 100 91 71 100 85 62 53 94 76 85 100

K K R G E L V G W S S S K F P I E L A K A F D L N V V Y P E N H A A S T A A K  
97 56 94 100 97 94 100 100 100 100 100 100 100 100 100 76 100 100 100 76 94 100 91 100 91 97 71 100 100 100 100 76 100 100 59 50 100 100 76

K D G L R L C Q A A E D M G Y D N D I C G Y A R I S L A Y A A G E P T S R K Y  
76 85 100 76 76 76 100 97 91 100 100 97 76 100 100 100 100 100 100 100 100 100 97 100 100 100 97 100 91 100 100 100 76 76 76 15 18 24 12

D P E T G E Y I I D P S T G K P L K D A [DN] G N V V I D E A T G K P K K D P K T  
24 12 18 18 21 18 24 18 24 18 24 9 15 24 24 21 21 24 24 21 9 24 21 18 24 12 18 18 9 12 24 24 24 12 21 24 24 24 24

Q T P Y L V L D N I L E I E A L P D G P E K E R - - - - - R L E A I S P I D [AS]  
15 15 24 21 15 9 18 21 21 15 15 24 21 18 15 24 24 18 21 15 21 24 18 21 0 0 0 0 0 24 12 15 24 18 15 18 15 76 38

R R M P Q P D F L L C C N N I C N M M T K W Y E N I A R M H N I P L I M I D I  
76 79 85 100 94 100 100 100 56 100 100 100 100 100 100 100 76 100 100 100 100 100 94 100 100 100 50 82 97 91 100 88 100 100 74 100 94

P F S N T V D V P E E K V D Y L I G Q F D Y A I K Q L E E L T G K K F D E K K  
100 76 65 94 88 94 76 68 76 82 82 76 76 76 100 76 35 76 100 94 65 44 100 100 88 94 94 100 85 91 97 100 100 100 100 100 94 100

F E D A C A R A N R T A A A W L K [AS] C K Y M G Y K P S P L S G F D L F N H M A  
100 100 62 88 100 68 62 100 100 100 100 100 65 100 100 100 82 38 100 44 97 76 50 94 97 100 79 100 76 94 100 100 100 100 100 100 100 100

D I V A A R C D E E A A E G F E L L A D E F E Q S I K E G T S T W E Y P E E H  
100 76 100 74 100 100 76 59 65 79 94 100 32 76 100 100 97 100 97 41 82 68 94 79 76 62 82 79 97 82 79 100 76 76 76 94 100 76 82

R I L F E G I P C W P G L K P L F E P L K D N G V N V T A V V Y A P A F G F R  
100 82 76 100 100 100 100 100 100 100 68 100 50 47 100 85 68 100 100 94 65 88 100 85 100 94 97 94 100 100 100 100 100 100 100 100 100 65

Y N N I R E M A A A Y C K A P C S V C I E T G V E W R E T M A K E N G I S G A  
100 62 79 47 76 94 94 94 76 100 100 79 100 100 100 76 100 100 94 100 100 65 100 100 79 100 100 97 76 76 76 76 68 100 76 74 76 100 76

L V N Y N R S C K P W S G A M P E I E R R W K E D L G I P V V H F D G D Q A D  
100 100 76 100 100 100 100 100 100 100 100 76 100 82 100 74 76 100 100 76 74 82 100 97 88 79 100 76 76 74 100 100 100 100 100 100 100

E R N F S T E Q Y N T R V Q G L V E I M [EQ] E R K E E K L A K G E E V Y T N F E  
76 100 100 100 76 68 76 100 100 50 100 100 100 100 100 100 100 76 100 44 76 76 88 50 62 65 65 91 68 76 71 53 71 76 76 74 76 62  
N T K E T D W S K E T I K H  
76 76 76 76 76 76 76 76 76 41 76 56 56 44

HgCoAdγ

M A E I K E L L E Q F K Y Y A E N P R K Q L D K Y L A E G K K A V G I F P Y Y A  
76 50 65 88 68 76 100 91 76 65 94 91 65 59 91 53 74 97 76 65 91 94 76 74 100 74 94 65 100 100 100 76 79 100 62 71 100 100 97 94

P E E I V Y A G G M V P F G V W G G Q G K P I E K A K E Y F P T F Y Y S L A L  
100 97 100 76 85 94 100 59 100 62 97 100 65 100 79 100 100 76 68 82 24 74 94 65 56 94 100 53 100 76 76 97 100 100 76 76 65 97 76

R C L E M A L D G T L D G L S A S M V T T L D D T L R P F S Q N Y K V S A G R  
76 76 100 100 100 68 100 100 100 97 85 100 85 97 76 76 71 62 32 76 94 82 76 100 100 100 100 100 53 100 100 100 76 82 100 71 65 91 56

K I P M I F L N H G Q H R K E E F G K Q Y N A K I F N N A K E E L E K I C D V  
100 76 85 76 56 100 97 76 94 50 100 76 100 79 91 44 94 100 82 56 76 76 76 41 71 76 47 41 76 88 68 82 100 100 82 91 85 41 76

K I T D E N L K K A F K V Y N E N R E E K R R F I K L A A K H P Q S I K A S D  
62 82 100 79 85 74 79 82 65 97 76 79 94 97 100 74 76 100 44 62 76 100 41 100 71 94 100 88 65 47 97 76 74 47 59 76 85 82 74

R S N V L K S S Y F M L K D E H T D L L R E L N Q E L E A L P E E Q W D G V R  
100 65 47 100 100 91 76 68 79 97 100 88 97 85 97 68 74 38 68 100 44 38 100 97 44 32 100 65 71 79 97 71 76 44 85 74 100 65 74

V V T S G I I T D N P G L L E V F D N Y K V C V V A D D V A H E S R A L K V D  
100 100 94 100 100 74 100 71 94 91 94 79 94 100 74 76 85 85 47 68 74 65 76 59 76 100 100 100 94 94 88 100 91 100 65 71 76 82 100

I D L S I A D P M L A L A D Q F A R M D E D P L L Y D P D I I E N K R P K Y V

68 76 65 76 76 50 94 85 82 62 100 100 100 76 100 100 94 74 85 94 76 100 76 59 100 100 100 97 74 74 35 15 21 76 100 76 71 79 94  
 L D L V K E N N A D G C L L F M M N F N D T E E M E Y P S L K Q A F D E A K I  
 47 71 88 68 88 79 76 59 100 76 100 76 76 91 100 100 82 74 100 74 100 76 100 100 100 100 100 76 100 100 76 100 74 74 38 85 59 56

P L I K M G Y D Q Q M V D F G Q V K T Q L E T F N E L V Q L S R F  
 100 76 94 100 68 100 76 100 100 94 94 62 100 100 100 100 74 71 100 76 82 85 76 100 65 82 44 74 74 76 41 71 44

Gcdα

M  
84

S K V M S L H D A I A K Y V E S G D S L C F G G F T T N R K P Y A A V Y E I L  
 81 91 81 88 72 100 69 91 100 84 72 81 81 100 72 75 100 100 66 56 66 69 100 100 100 100 100 94 91 100 100 91 100 100 100 69 100 100 53

R Q G Q T D F I G Y S G P A G G D W D M L I G C G R V K A F I N C Y I A N S G  
 100 100 100 63 53 100 94 72 72 72 69 100 94 100 100 91 100 100 100 91 97 100 100 50 84 100 53 84 88 66 100 100 100 100 66 100 91 100 100

Y T N V C R R F R D A V E K K [GH] N L L L E D Y S Q D V I M L M L H A S S L G L  
 84 100 100 100 63 100 100 100 100 47 63 63 100 72 47 47 47 81 66 66 100 100 100 100 100 100 88 78 94 63 84 84 100 100 66 81 100 100 100

P Y L P V K L M E G S D L E Y K W G I S K E I R K T I P K L P D [DK] K L E R I P  
 100 63 100 100 100 72 91 100 47 100 94 78 97 50 47 78 100 100 100 97 50 100 47 100 56 69 66 63 94 91 91 66 47 100 69 47 47 66 44

N P F K E G E K V I A V P V P R L D T A I I H V Q K A S I N G T C S I E G D E  
 100 100 88 66 47 94 81 47 94 50 97 75 100 100 100 66 81 100 75 100 88 100 53 94 100 78 100 97 63 59 100 100 84 69 91 72 100 84 84

F H D I D I A I A A R K V I V T C E E I V S E E E I R N R D P S K N S I P Q F  
 100 94 100 69 100 84 94 75 100 100 53 75 72 100 97 53 53 100 94 53 94 59 66 91 75 100 91 9 66 84 91 38 69 88 72 94 97 50 91

C V D A V V H V P Y G A H P S Q L Y N Y Y D Y D A D F Y K M Y D K V T K T - -  
 91 100 100 100 100 91 84 47 100 69 100 47 88 100 84 100 47 97 72 94 100 100 97 100 63 53 94 72 97 78 100 88 59 81 66 100 94 0 0

- - - - - - - - - - - - - - - - - - - - - - - - - - - - - - - - - - - - - - - - - - - - - - - - - - - - - -  
 0 0 0 0 0 0 0 0 0 0 0 0 0 0 0 0 0 0 0 0 0 0 0 0 0 0 0 0 0 0 0 0 0 0 0 0 0 0 0 0 0 0 0 0 0 0 0 0 0 0 0 0 0 0 0 0 0 0 0 0 0 0 0 0 0

- - - - - - - - - D E D F E K F I Q E W V [IV] D V K D H E [EG] Y L N K L G A S R L  
 0 0 0 0 0 0 0 0 0 50 100 94 100 47 47 91 47 56 97 91 94 47 72 72 94 94 75 59 47 88 84 44 100 78 100 66 34 100 81

C K L K V V P G F G Y A A K L V K D G E  
 28 78 97 56 81 81 88 97 84 53 100 84 66 69 66 66 94 47 56 50

Gcdβ

M  
53

K N Y K N Y T N K E M Q A I T I A K E I K D G Q I V I V G T G L P L I G A S V  
 47 65 100 62 82 100 100 94 94 100 100 100 100 76 94 88 100 85 56 100 71 82 79 82 94 79 94 100 100 100 100 100 100 100 100 100 100 100 100 56 65

A K R K F A P N C K L I V E S G L M D C S P I E V P R S V G D L R L M A H C A  
 100 100 47 44 79 94 100 68 100 65 85 100 100 100 100 100 100 100 100 100 85 100 88 100 100 100 100 100 100 100 100 62 100 59 100 53 100 94 62

V Q W P N V R F I G F E T N E Y L N G N D R M I A F I G G A Q I D P Y G N V N  
 82 85 100 91 100 59 91 91 82 100 100 91 56 97 94 56 91 62 53 65 79 100 76 97 100 100 100 100 100 100 97 100 56 100 100 100 56 56 100 100 100 56 56 100

S T I I I G G K D D Y H K P K T R F T G S G G A N G I A T Y S N T V I M M Q H E  
 100 100 44 97 94 6 6 44 100 100 38 32 100 88 100 100 100 100 100 100 100 100 100 100 100 100 76 100 97 97 82 74 100 100 68 100 100 88 100 100 88

K R R F I D K I D Y V T S V G W A D G P G G R E K L G L P G N R G P L A V V T  
 100 100 100 100 65 59 88 82 100 100 79 100 100 59 100 100 44 56 100 88 97 100 100 91 62 79 100 88 97 94 94 82 100 100 50 76 100 100 100

D K G I L R F D E K T K R M Y L A G Y Y P [GT] S S I E D I I E N T G F E I D T S  
 100 50 100 76 91 56 100 100 88 62 100 100 97 100 100 100 97 91 100 100 88 44 56 56 56 100 85 62 44 100 100 100 100 100 71 74 100 59 94

R A V Q L E A P S E E [IV] I K M I R E E I D P G Q A F I K V P V E  
 91 100 94 44 94 82 88 100 62 74 68 50 100 85 76 100 100 100 50 100 100 100 100 88 100 100 100 85 91 100 74 97

4-aminobutyrate pathway

AbfH

M E A L R V V P K I F Y F D T F K E F N E E F K I G K N D L V I T N E F I Y E P  
 98 40 38 60 40 45 38 75 55 65 38 40 73 58 73 60 50 68 98 38 55 60 88 48 40 78 58 38 98 83 65 75 98 83 78 75 68 95 78 80

Y M K P L G L D C N L I F Q E K Y G T G E P S D E M I D S M T K D M K K Y N F  
 65 58 65 40 63 48 50 40 40 48 35 55 63 93 88 78 50 98 48 98 95 95 88 88 83 93 55 40 48 53 35 53 45 50 48 48 38 50 65

D R I I A F G G G T I I D I C K I F A L K V P E K S I D L F E G K V P P K K V  
 53 98 70 93 85 38 98 95 95 85 60 48 95 88 43 98 58 48 50 93 45 38 40 38 35 45 35 90 70 88 53 63 45 43 45 48 38 98 28

K E L V V V P T T C G T G S E V T N V [AS] I A E L K S K H T K K G L A V D E T Y

93 68 98 58 43 68 100 100 98 98 100 98 100 100 100 98 98 100 60 50 83 68 73 73 70 75 55 65 95 100 68 98 88 95 48 53 63 38 65

A D Y A V L I P E L L K G L P Y K F F [AV] T S S I D A L I H A I E S Y L S P K A  
98 83 43 98 93 80 93 85 95 50 48 63 65 100 100 50 73 70 75 43 68 100 78 60 98 100 95 78 100 100 48 100 95 60 78 100 100 80 75

S P Y T E M F S L Q A I K M I L D G Y K K I V D K G E E E R F N H L R D F [LV] L  
48 75 40 78 45 48 58 93 38 38 100 70 38 50 100 40 45 60 70 65 68 80 43 43 58 93 48 80 43 98 58 40 38 70 38 80 63 40 53

A S N Y A G I A F G N A G C A A V H A L S Y P [IL] G G A - Y H V A H G E A N Y Q  
95 93 98 73 98 98 100 100 100 83 95 90 100 70 63 98 98 98 98 78 98 98 55 48 98 75 45 0 50 98 98 48 98 100 100 70 100 100 65

F F T E V F K M Y S R K K P N G K I I K L N K I L A D I L E C D P N C D V Y G  
70 100 90 70 90 65 88 38 100 35 45 85 53 80 48 98 50 95 35 40 58 43 43 40 65 80 45 38 90 38 85 45 53 35 35 35 80 85 35

E L E K L L N K L I A K K A L R E Y G M V E E Q I D E F T D S V I A N Q Q R L  
53 93 63 40 63 100 55 45 75 53 40 80 83 50 98 53 80 98 98 78 35 70 33 40 65 40 50 98 60 50 78 55 55 43 60 98 80 98 98

L A N N Y V E L S R E E I R E I Y K N L Y  
75 80 88 98 80 78 55 88 40 50 58 63 78 50 45 90 55 40 43 93 83

4Hbt

M  
47

N W K E L Y K S K L C S A D E A V K D K I K [NS] G D R V V F G H A C G E P [PQT] V L  
34 84 47 63 34 96 43 53 74 45 51 55 61 49 88 100 64 47 4 37 80 66 32 59 43 57 62 61 62 43 92 61 41 59 76 59 20 25 71

V E A L V R N K E L Y K N V E I V H M V S N L G K G E Y A K P E M E E H F R H  
39 54 89 58 33 33 74 43 55 33 45 49 32 62 72 88 21 89 61 58 42 3 39 95 46 41 41 92 34 37 41 64 59 41 32 59 91 72 55

N A L F V G G N T R K A V N S G R G D F T P C F F H E V P K L F R K E G R L P  
75 38 39 97 50 66 57 46 64 93 43 92 33 42 30 50 42 61 96 57 74 96 33 80 100 36 89 49 82 53 82 64 47 37 36 58 21 74 43

V D V A L I Q V S P P D E H G Y C S L G V S C D Y T K P A A E S A K I V I A Q  
34 100 75 43 58 32 88 80 72 45 99 86 83 66 100 84 95 100 36 97 29 97 53 100 96 83 67 26 95 49 59 25 93 54 36 93 89 68 63

V N K Q M P R T L G D N F I H I S D I D Y I V E K D T P I P E L Q P F P K I G  
58 100 53 43 55 100 71 71 39 100 39 29 51 55 95 54 63 41 46 84 76 95 71 87 24 57 30 91 53 26 78 67 34 67 3 67 42 70 87

E V E E A I G E N C A S L I E D G D T L Q L G I G A I P D A V L L F L K D K K  
70 55 97 33 49 100 100 47 53 89 97 78 97 88 38 97 100 54 97 100 100 97 100 97 100 74 100 100 82 100 93 82 41 86 99 54 76 91 91

D L G I H S E M I S D G V V D L I E A G V I T N K K K N L N P G K M I V T F L  
91 99 100 100 100 82 100 100 67 88 100 100 57 59 42 96 34 42 34 97 87 93 53 55 72 43 100 50 51 39 55 49 100 26 41 50 67 96 84

M G T K K L Y D F A N N N P A V E L [HY] P V D Y V N N P A I I A Q N D N M V S I  
87 100 68 62 70 92 100 88 63 38 43 66 100 91 47 59 84 41 32 95 99 87 97 86 100 42 100 20 53 89 53 51 64 62 61 80 76 91 93

N S A I Q V D L M G Q V N A E S I G L K Q F S G V G G Q V D F V R G A S M S K  
100 99 61 63 62 84 100 95 80 100 100 87 39 68 93 33 59 82 30 49 87 79 97 100 38 100 100 100 96 100 88 59 100 97 74 34 66 62 57

G G - - K S I I A M P S T A A K K D K G T I S K I V P I L D E G A A V T T S R  
61 99 0 0 70 67 99 75 97 42 95 97 78 64 43 22 20 20 41 72 37 67 100 53 100 91 41 33 49 54 78 99 70 45 74 99 100 74 100

N D V D Y I V T E Y G I A H L K G K T L R E R A K A L I E I A H P D F R E E L  
87 86 89 89 97 51 68 100 100 91 100 78 97 33 99 67 93 89 51 87 84 72 100 99 38 47 100 93 32 97 100 99 100 50 82 100 75 46 100

R K E [AF] E K R F G E L Y  
28 32 47 37 33 43 55 89 34 36 36 18

AbfD/Isom

M  
75

A L M T G A Q Y I E S L R K L N L - K V Y M F G E K V E N P V D H P I I R P S  
65 77 85 98 65 38 54 98 52 90 98 85 96 88 92 65 42 0 46 92 98 52 65 98 75 35 56 40 77 65 98 100 65 100 50 77 100 100 100

L N S V A M T Y D L A Q D P E Y E D L M T V T S N I T G E K I N R F G H L H Q  
52 98 69 94 56 56 96 100 67 100 100 56 40 79 94 100 35 65 100 98 96 50 77 98 58 46 96 100 56 69 83 100 100 100 29 85 56 100 94

S T E D L V K K V K M Q R L C G Q K T A S C F Q R C V G M D A F N A V Y S T T  
88 48 46 100 100 46 83 100 96 98 100 98 100 98 44 100 98 96 100 96 69 100 100 100 100 100 100 98 100 96 96 100 98 58 85 100 96 96

Y E M D K A [HL] G T N Y H E N F V K Y L [KT] Y I Q E N D L [TV] V D G A M T D P K G D  
58 77 38 100 58 50 31 92 98 63 100 92 42 56 88 38 63 65 67 33 83 31 94 73 71 100 94 50 94 100 100 98 100 100 100 100 100 100 98

R S L S P S A Q A D P D L F L H I V E R R E D G I V V R G A K A H Q T G S V N  
100 54 98 71 100 85 52 100 42 100 94 100 52 73 88 77 73 90 100 65 100 60 98 100 92 67 100 81 100 98 100 90 100 100 100 100 38 44 100

S H E H L I M P T I S M T E A D K D Y A V S F A V P S D A E G I F M I Y G R Q  
 100 100 98 52 88 54 96 100 100 67 65 96 56 83 52 100 75 90 98 90 90 71 100 75 77 96 50 100 69 65 98 50 48 81 98 77 100 100 100

S C D T R K L E E G A D V D L G N K E F G G H E A L V V F D N V F V P N D R I  
 100 100 100 100 100 100 75 100 48 75 65 67 42 100 50 100 100 42 54 88 100 100 40 100 94 98 92 75 96 98 65 98 100 83 100 85 63 94 75

F L C G E Y D F S G M L V E R F A G Y H R Q S Y G G C K V G V G D V L I G A A  
 96 54 73 77 100 48 42 85 58 83 71 79 100 100 100 100 100 100 79 100 100 100 100 96 96 100 100 96 100 98 100 100 100 71 100 100 100 75

A L A A D Y N G A N K A S H I K D K L I E M T H L N E T L Y C C G I A C S S E  
 100 75 77 88 92 100 100 100 54 29 88 100 98 100 71 100 100 100 79 98 100 100 56 100 100 100 100 71 98 90 58 85 96 96 100 100 100 56 92

G H K T E A G N Y Q I D L L L A N V C K Q N V T R F P Y E I A R L A E D I A G  
 100 54 65 90 42 63 100 79 98 40 96 98 85 96 100 100 100 96 98 100 100 100 88 100 100 77 100 100 100 100 44 100 100 100 96 100 100 100 100

G L M V T M P S E K D F K S P L K V G T S G M E I G E Y V E K Y L K G V S V V  
 100 77 79 100 100 75 100 92 88 60 100 46 48 54 40 31 31 31 29 29 29 31 29 38 48 100 31 46 52 33 100 96 58 52 65 46 38 29 44

S T E N R M R I L R L I E N I T L G T A A V G Y R T E S M H G A G S P Q A Q R  
 56 92 73 33 100 85 69 56 92 100 58 63 100 98 50 50 100 100 60 69 100 100 100 100 92 100 100 100 75 100 100 100 100 100 100 100 100 100

I M I S R Q G N L E Q K K E L A K K I A G I K  
 98 98 100 71 100 98 69 94 56 42 38 100 100 48 88 81 79 33 96 79 42 90 50

Lysine pathway

KamA

M - T V N T R K P F F P D V T D E E W N D W R W Q V R N R I E T V D Q L K K Y V  
 25 0 24 26 27 38 60 32 27 29 55 45 37 75 70 58 56 40 94 64 79 83 23 98 98 48 37 73 70 57 39 36 38 37 36 96 57 50 49 33

N L L V D E [RT] F T [AEP] E E E E G V K E T L - K T L R M A I T P Y Y L S L I D P N  
 19 76 10 10 7 12 5 14 50 26 61 83 60 56 65 50 27 37 37 62 0 30 62 57 76 81 62 74 81 100 83 81 40 65 85 55 85 51 26

D - - - - S P [MP] A [AG] P A S S T E A P N A C P I R K Q A I P T I Q E L H T D W  
 36 0 0 0 0 0 2 5 5 4 2 4 4 4 5 14 12 14 60 31 14 71 100 63 99 45 80 61 60 100 56 36 25 85 43 35 14 14 14

Q S H P A D L L D P - - - L H E D E D - S P V P G L T H R Y P D R V L [FL] L I  
 26 51 15 43 35 71 50 33 99 82 0 0 0 0 92 63 99 70 36 71 0 64 83 67 68 85 76 87 95 89 100 96 83 85 90 96 39 77 52

T D M C S M Y C R H C T R R R F A G Q S T D A I D K L K L D A M P M D R I D K  
 74 74 42 100 67 65 99 100 86 95 100 96 100 76 83 60 61 83 35 37 15 67 7 8 11 15 13 13 10 25 46 31 63 31 44 56 64 64 36

A I E Y I R K T P Q V R D V L L S G G D A L L V S D E R L E Y I L K R L R - A  
 43 74 49 95 73 40 26 62 87 43 80 98 99 99 71 58 96 100 100 100 54 76 50 52 68 71 30 35 89 82 40 73 51 35 36 99 73 0 43

I P H V E I I R I G S R T P V V L P Q R I T P E L - V V E G L E R - V N M L K  
 96 65 82 85 77 64 76 100 60 79 52 81 54 77 85 67 74 100 85 80 62 85 55 55 77 0 13 10 10 14 6 8 15 0 52 43 60 82 60

K Y H G V P I W L N T H F N H P K E V T - P E A K E A C E M L A D A G I R P L  
 67 71 71 14 15 82 51 64 56 74 96 96 82 100 95 81 39 86 44 98 0 65 69 46 40 35 99 65 58 35 75 70 64 79 100 52 14 75 64

G N Q S V L L R G V N D S V P V M K [DR] L V H E L V [DG] K M R V R P Y Y I Y Q C D  
 74 99 100 40 100 98 81 75 95 57 100 80 39 39 26 50 65 58 24 100 57 69 25 98 63 7 37 40 82 76 85 100 100 100 68 86 68 83 96

L S M G L E H F R T P V S K G I E I I - E G L R G H T S G Y A V P T F V V D A  
 74 64 30 87 36 58 99 74 98 85 75 77 55 65 85 63 68 81 62 0 80 36 76 77 100 74 83 79 100 56 83 73 100 67 67 86 81 96 73

P G G G G K I P V M P Q Y V I S Q S P E - G - A H R V V L R N Y E G S I E S A  
 98 74 85 94 86 86 39 68 65 62 86 42 85 56 57 71 57 49 45 5 0 20 0 4 26 35 56 56 76 82 93 52 65 83 12 13 14 6 7

D L E A L N V I T T Y T E P E [DN] Y T H E P C Y Y W N C D E E K F E K M Y E I S  
 13 6 6 14 14 6 60 60 54 57 96 45 76 93 40 25 49 25 20 40 24 52 18 10 14 2 31 7 23 32 21 23 32 33 18 29 27 19 20

G V A [AM] L L E G - R - - - - G P A G [AG] S R E [AG] E E - - - G L K M [AIL] S  
 65 55 35 21 63 29 19 7 0 2 0 0 0 0 0 0 0 0 0 4 5 8 8 4 5 6 5 5 5 2 0 0 0 0 0 52 19 23 26 4 36

L E P S H L A R H E R N K K R A E A E G K K  
 40 57 62 26 24 55 26 60 31 31 60 27 23 40 25 20 35 20 23 23 27 23

KamD

M S K L D L D W [AG] L V E E A R E L A K K I A A D V Q - V F I D A H T T V T V E R  
 37 34 75 80 33 78 78 29 18 46 75 24 30 88 95 39 37 93 37 38 78 62 37 45 47 61 0 26 63 50 50 26 67 63 97 89 39 79 97 97



T [IV] C R L L G I D G V D E F G V P L P N V V V D H L K E N - - - - G N L S L G  
72 38 57 97 80 50 97 66 70 86 57 74 33 29 62 71 97 80 66 97 58 57 93 76 29 41 58 36 36 0 0 0 0 54 30 68 28 30 99

V A [KY] Y I G N A M I E T G L A S P Q E I A E K V A K G E L D K L T K L P W H D  
45 76 28 42 39 63 70 88 59 29 46 62 55 50 5 30 74 70 58 63 87 76 43 39 74 32 49 50 55 62 5 43 45 39 29 37 26 37 47

D F D I [KR] L A L R P I A H A T V E R I K A N R K A R E D Y L E Q F G G D [GK] K G  
28 33 25 55 28 29 47 47 25 25 37 39 21 45 36 42 36 50 80 34 41 57 78 30 26 99 72 25 42 39 33 25 33 39 74 36 37 30 34

P Y L Y V I V A T G N I Y E D V V Q A Q A A A R Q G A D V I A V I R T T G Q S  
99 51 45 99 64 99 99 99 99 99 80 96 91 86 99 71 30 99 97 43 93 93 92 76 70 99 99 99 51 71 99 99 99 99 49 99 74 99 99

L L D Y V P Y G A T T E G F G G T Y A T Q E N F R I M R K A L D E V G E E L G  
99 89 99 76 99 99 54 97 82 99 76 95 99 82 83 99 99 53 99 99 96 96 99 99 89 74 96 99 57 95 96 99 61 67 59 28 82 57 79

R Y I R L C N Y C S G L C M P E I A A M G A L E R L D M M L N D A L Y G I L F  
91 99 78 78 91 54 99 99 58 99 99 99 99 99 92 99 92 96 67 67 68 83 57 97 82 99 99 61 86 99 97 99 75 61 99 99 99 93 99

R D I N M K R T L V D Q Y F S R V I N G F A G I I I N T G E D N Y L T T A D A  
99 99 99 99 79 41 99 99 57 59 99 99 37 82 96 99 33 86 67 61 51 97 96 50 87 99 97 99 99 99 99 99 99 88 99 99 93 99 99

V E E A H T V L A S Q F I N E Q F A L [ER] A G L P E E Q M G L G H A F E M D P D  
34 84 59 95 92 99 99 66 80 99 83 61 75 99 99 66 76 97 63 20 91 92 80 68 54 66 87 61 99 93 99 99 89 93 99 58 45 100 30

L E N G F L L E L A Q A Q M A R E I F P K A P L K Y M P P T K F M T G N I F K  
38 63 64 67 80 78 47 100 95 93 79 100 61 62 58 97 72 64 100 97 53 92 96 88 100 84 100 100 100 100 91 57 87 88 95 68 87 100 54

G H I Q D A L F N I V G I M T G Q G I Q L L G M L T E A I H T P F M S D R A L  
87 76 39 67 91 68 58 89 92 34 63 38 64 29 100 51 100 53 64 41 100 82 100 97 49 99 100 99 70 86 95 100 67 54 70 99 100 42 79

S I E N A R Y I F N N M K D I G [DE] E I E F K E G G I I Q T R A Q E V L D K A A  
54 66 70 78 84 38 100 70 71 64 59 33 41 43 33 63 29 54 61 49 72 67 32 59 99 57 57 41 32 100 97 32 67 93 95 22 54 76 29

E L L E E I E T - - D - - G - E G L F K A I E K G V F G D V K R P I D G G K G  
34 92 99 46 32 74 45 22 0 0 3 0 0 3 0 22 88 61 63 30 54 64 57 55 95 25 99 61 39 53 63 100 74 32 68 84 100 93 100

L D G V F E K D S T Y F N P F I E L M L G G D R  
92 41 97 100 34 45 76 38 28 24 100 54 99 96 68 55 47 64 64 46 39 49 29 24

KamE

I K P Y G D T M N D G K V Q L S F T L P V P - - - - C G E K A V E A A K Q L A K  
49 51 96 99 99 99 83 58 67 99 99 62 82 99 47 99 99 92 99 97 87 62 0 0 0 0 28 41 51 36 61 26 83 93 99 36 61 82 63 36

K M G L [EV] N P A V V F S E A L D K G F T F F V V Y G [AS] T S H T V D Y T A I K V  
78 96 99 42 25 45 66 29 82 53 43 39 42 34 68 37 38 38 79 66 88 67 62 67 100 91 25 33 39 57 34 87 92 72 53 38 80 32 95

- P E V E I D T M D M H E C N [AK] Y I E E N I G R K I V V V G A S T G T D A H T  
0 41 30 45 57 30 28 38 57 41 61 26 87 28 38 26 50 82 33 63 41 38 68 99 41 43 79 68 70 100 100 49 75 95 88 100 95 100 95

V G I D A I M N M K G Y A G H Y G L E R Y K G I E A Y N L G S Q V P N E E F I  
100 100 86 100 99 100 72 100 79 100 100 54 89 99 64 79 100 100 100 79 97 36 33 46 41 75 51 100 82 100 71 100 95 57 75 78 70 54 59

K K A I E L K A D A L L V S Q T V T Q K D V H I K N L T N L V E L L E A E Y P  
36 75 86 55 68 49 45 100 99 88 59 97 93 100 100 58 99 100 97 68 78 59 100 67 33 96 59 68 36 78 59 71 66 67 76 78 72 7 16

A G - - G L R D K V I L I A G G P R I T H E L A K E L G Y D A G F G P G T Y A  
11 11 0 0 78 51 80 62 67 37 59 86 64 37 100 100 68 100 78 54 50 47 82 91 64 95 99 100 70 100 86 84 100 97 55 76 59 43 66

D D V A S F I V K E M V K R  
51 75 100 95 43 63 55 45 29 63 39 47 24 75

Kdd

M K K G C K Y G T H R V I E P A - G G S G V L P Q P A K K I D N D M E E I Y S N  
45 49 61 75 49 51 69 100 60 90 100 99 60 70 91 35 0 4 3 3 95 71 99 97 100 55 100 31 65 62 65 70 48 64 23 40 71 49 36 79

E I L I D V I A L N I D S A S F T Q I E E E A G G D G - - D V - E K I K A K I  
100 65 75 91 81 96 34 38 100 100 66 100 68 100 100 91 68 99 71 36 68 48 58 70 58 13 4 0 0 81 34 0 53 64 74 51 44 34 53

L E I V A E R G K M Q N P V T G S G G M L I G T V E K I G D D L V G K T D L K  
51 48 96 91 39 56 60 100 100 66 66 100 99 92 100 100 100 100 100 94 78 100 62 87 68 51 69 100 39 43 60 31 45 47 34 58 88 75

V G D K I A T L V S L S L T P L R I D E G I K D I K P D I D Q V E I K G K A I

64 99 97 68 83 99 95 100 96 100 100 73 95 100 100 100 53 91 61 49 12 79 38 22 55 34 49 40 51 73 55 92 43 69 38 95 58 100 70  
L F E S G I Y A V L P E D M P E T L A L A A L D V A G A P A Q V A K L V K P Y  
100 100 69 74 77 78 75 95 43 81 100 26 100 48 65 74 34 95 86 99 77 68 92 100 100 71 100 100 96 97 74 49 84 64 74 95 49 73 8

V A R R A R E G D AGP R G Q S V A I L G A A G K S G M L C A Y E A R K R V G P T  
8 8 4 8 4 5 5 6 5 3 5 55 35 44 100 45 60 56 100 44 51 100 100 100 100 52 99 77 36 66 60 100 31 70 58 42 74 39 49

G K V I G V V R S E K E K A L L K R L G L A D R V V I A D A T K P V E V L E A  
87 51 81 73 66 52 52 44 47 53 43 43 32 36 36 75 30 30 39 55 38 40 52 21 60 42 42 71 88 100 70 45 82 45 30 74 44 34 58

V L E A T - - - - - - - - - - - - - - - - - - D G K E V D V T I N C V N V P  
65 38 35 55 40 0 0 0 0 0 0 0 0 0 0 0 0 0 0 0 0 0 0 0 0 0 0 0 39 94 39 34 32 99 66 43 66 78 70 88 74 78 57

N T E M S S I L P T K D G G I V Y F F S M A T S F T K A A L G A E G V G K D V  
48 79 100 77 48 36 87 95 38 47 66 68 32 99 45 57 74 99 100 97 99 99 99 84 100 83 58 100 99 100 100 100 99 77 86 66 99 62

T M I V G N G Y T K G H A E I T L Q E L R E S A A L R E L F E E L Y A  
79 96 64 62 100 100 100 99 66 39 60 100 96 43 56 68 100 40 45 81 100 73 47 32 39 66 88 35 43 94 44 49 51 83 39

Kce  
M  
74

E K L I I T A A I C G A E V T K E Q N P A V P Y T V E E I A R E A E S A Y K A  
64 77 70 78 88 100 74 97 53 52 100 99 99 73 77 73 65 32 58 99 61 47 100 56 97 44 71 99 73 52 55 56 94 30 44 62 58 29 88

G A S I I H L H V R E D D G T P T Q D K E R F R E C I E A I R E K C P D V I I  
100 100 62 62 64 100 62 100 65 100 39 61 81 84 55 99 87 83 58 49 57 64 69 49 45 36 47 40 73 78 68 55 39 48 49 75 58 84 62  
Q P S T G G A V G M T D E E R L Q P T E L T G [AE] D H P E M A T L D C G T C N F  
91 62 100 95 100 99 92 90 68 70 60 27 40 78 99 81 65 73 42 57 73 5 5 3 5 19 95 78 91 87 77 92 52 57 100 96 48 100 99

G - - - - - - - - - - G D E V F V N T E N T I K N F [AG] K R M I E R G V K P E I  
99 0 0 0 0 0 0 0 0 0 0 42 77 58 65 100 35 100 60 43 42 34 68 34 27 70 40 47 36 58 30 79 62 64 51 68 100 100 42

E V F D K G M I D Y A I R L [AL] K K K G L I Q G K P M H F D F V L G V P G G M P  
100 57 94 73 42 94 66 48 61 26 66 38 70 66 21 64 9 43 96 36 48 29 23 22 79 47 91 75 77 94 99 64 99 99 55 74 44 58 36

A S A R D L V F [LM] V E Q M L R S I P E E - - G S T W T V A G I G R H Q F P M A  
56 35 38 56 52 86 60 53 35 39 51 5 6 5 8 51 60 97 55 6 0 0 71 64 84 79 65 70 68 96 51 99 94 42 40 49 65 39 70

A L A I V M G G H V R V G F E D N V Y I [AD] K G V L A K S N G E L V E R V V R L  
47 40 79 69 39 58 100 100 87 77 100 96 100 69 100 100 86 53 74 39 22 87 97 68 74 83 60 81 94 51 66 97 97 68 58 51 74 70 30

A K E L G R E I A T P D E A R Q I L G L K  
86 47 71 58 81 97 66 52 83 74 82 48 90 99 97 26 71 97 53 65 39

Kal  
M  
39

K S T I R L R M S S H D A H Y G G N L V D G A R M L Q L F G D V A T E L L I R  
65 43 30 68 93 47 81 81 80 36 54 82 97 99 99 74 99 73 97 97 95 99 95 65 68 96 53 93 99 100 100 96 99 100 100 85 78 97 47

L D G D E G L F K A Y D S V E F L A P V Y A G D Y I E A E G E I V N V G N T S  
23 100 100 100 100 99 100 99 34 80 100 81 41 91 78 100 46 92 100 95 36 97 100 100 45 77 100 78 32 85 72 85 57 22 70 100 69 43 100

R K M V F E A R K V I V P R P T D I [GL] S D S A A D V L A E P I V V C R A T G T  
100 64 88 36 96 76 86 73 84 97 77 34 58 80 68 4 82 55 3 54 58 97 99 86 65 91 97 43 86 97 72 77 85 76 66 100 45 100 96

C V V P K D K Q R  
82 95 73 89 68 55 58 81 82

AtoA  
K  
48

N L V R E V I A K R V A Q E L K D G D V V N L G I G L P T L V A N Y V P E G V  
28 51 31 73 76 25 85 97 48 96 69 99 35 93 61 37 85 99 34 56 99 100 100 100 97 100 72 100 99 80 92 62 87 77 48 55 25 46 38

D V I L Q S E N G I I G V G P A P E E G K E D P D L I N A G G G F V T A L P G  
35 73 34 52 93 92 100 100 100 35 48 94 42 97 83 51 92 46 41 77 37 82 77 68 49 76 44 97 100 99 49 44 28 56 92 46 34 49 96

A A F F D S A T S F G I I R G G H V D A T V L G A L Q V D E K G N L A N W M I  
79 35 56 100 87 94 89 32 100 100 58 61 96 100 97 100 90 63 96 44 59 76 100 100 89 75 54 100 69 70 35 100 46 90 100 99 99 65 70

P G P K M V P G M G G A M D L V V G A K K V I V A M E H T A K G G - - - - A P  
96 94 3 92 49 69 72 96 94 100 100 94 100 100 100 69 56 99 87 79 52 93 79 80 77 96 68 93 68 45 72 65 35 0 0 0 0 10 54

K I L K K C T L P L T A V G V V D L I I T E L A V I E V T D E K G L V L K E I  
100 92 73 69 41 99 45 96 100 86 100 62 28 55 35 97 55 58 92 52 97 65 32 59 85 39 54 75 77 37 32 4 97 89 58 83 35 97 49

A P G S T L E E V K A A T E A D L I V A D D L K K

38 66 31 30 61 34 66 42 49 34 49 25 93 61 69 27 63 48 42 44 39 46 49 51 20

AtoD

M M K K I V S A E E A I A H - I K D **G** M T V M I **G G F** L A C **G** T P E N I I D A L  
46 34 46 65 34 38 65 34 41 69 73 35 41 30 0 56 58 83 96 54 75 48 55 49 99 100 99 58 42 49 99 59 92 76 23 51 79 44 68 76

I E K G V K D **L** T I I A **N** D T G F P D K **G** I G R L V V N N Q V K K V I A **S** H I  
37 52 48 77 72 70 73 99 82 44 52 41 97 70 65 61 35 42 70 34 100 41 94 46 94 35 41 65 32 72 65 70 80 61 69 51 97 69 68

**G** T **N** D S P E T G R Q M [NQ] S G E L E V E L V **P Q G** T **L** A **E** R [IV] **R** A G **G** A **G** L G  
96 66 96 4 4 56 70 63 51 62 54 65 25 42 93 73 56 87 77 90 82 55 99 99 100 94 97 90 100 87 42 100 83 75 100 41 100 72 89

G I L **T** P **T G** L **G T** I V A E G G L P W R Y D A D G [ANT] V A K A S P P **K** Q I I N V  
85 38 72 97 77 96 99 45 100 99 38 79 41 83 94 11 11 11 7 6 11 6 4 7 11 3 11 6 4 7 11 7 7 100 54 31 54 28 46

D G - G [EG] E K D Y L L **E** K P I R A D V A L I K A S K [AV] **D** E L **G N** L V Y R K T T  
63 90 0 3 3 3 61 38 79 68 92 97 46 79 51 41 85 94 54 93 69 46 35 49 28 63 38 100 42 25 100 100 61 38 48 30 48 77 49

R **N F** N P L M A M A A D V V I V E A E E I V P V G E L D P E H V H T P G I F V  
51 97 97 73 94 59 86 89 41 94 79 55 31 68 79 61 86 52 63 68 56 90 46 30 94 38 52 38 92 44 35 52 42 52 62 45 77 69 82

D Y I V K  
72 63 69 86 32

All

Bcd

M D F K L T E E Q E M L R Q M V R E F A E N E V T K P I A A E I D E - - - T - -  
72 34 63 12 57 45 40 53 44 42 27 36 48 23 31 43 66 50 87 60 59 33 79 63 0 45 88 28 77 47 61 21 86 47 0 0 0 31 0 0

- D E R F P R E T M V K K M A K N K L G L M G I P [FI] P E E Y G **G** A G - - - [EG] D  
0 1 41 30 68 89 18 70 28 1 51 30 68 55 41 38 1 0 28 85 34 40 81 48 54 25 79 41 74 81 93 99 48 89 0 0 0 0 0

G D Y L S Y N A I A V E E L S R G C V C A T T G V I L S A H T S L G A W P I L  
30 69 22 53 38 70 2 46 36 50 60 92 94 62 53 45 1 2 40 58 52 34 54 54 55 54 36 68 66 67 53 65 82 35 28 15 70 75 26

K F **G** T - E E Q K Q K Y L P P L A S G P D D E K L L G A F G L T **E** P N A **G** S **D**  
14 49 95 73 0 68 72 94 90 34 70 70 87 50 39 68 61 39 94 1 1 1 61 48 1 45 79 82 81 58 89 87 100 94 40 87 100 60 99

A A G - Q Q T T **A** V L - - - D R D E - E A G - T D [DG] E Y V L N **G** S **K** I F I T N  
81 38 52 0 38 39 88 52 98 66 39 0 0 0 3 14 50 7 0 14 0 76 0 0 78 1 31 65 53 80 90 100 42 100 44 81 93 92 89

G G V A D T V V Y V V F A M T D - - - - - K S K D K R G K G - T K G I S A F  
57 46 22 80 55 3 2 29 48 43 59 54 92 32 92 69 0 0 0 0 0 0 30 37 20 5 6 6 9 23 74 0 28 59 82 68 81 76 87

I V E K [KR] E P G F G E G G T P **G** F S I G K K E D **K** M **G** I R G S S T C E L I F E  
69 82 76 54 5 2 2 2 2 2 4 47 44 64 100 72 55 30 84 43 32 72 36 98 62 100 75 70 50 84 33 90 24 71 76 52 74 54

D C R V **P** K E N L L **G** K V E K E G L D E R L A R A R [ES] G - Q R - K **G** F K I A M  
48 48 53 65 95 55 60 72 74 80 98 41 1 0 2 69 92 1 1 1 1 1 1 1 1 1 1 1 1 1 1 1 0 1 1 0 38 98 90 46 68 84 86

K T L D G G **R** I G I A A Q A L **G** I A Q G A L D E A V A **Y** A K E **R** K Q **F** G K P I  
24 72 93 79 63 78 100 72 72 71 78 72 71 83 63 96 68 87 45 69 84 58 44 47 59 37 26 95 35 76 76 100 42 83 98 93 43 61 70

A K F **Q** G I Q F K L **A** D M A T K I E A A R L L V Y K A A W L K G Q D A G L D D  
39 28 60 96 30 32 64 71 29 58 98 73 79 46 51 50 35 53 71 85 69 44 78 65 73 28 91 88 21 36 61 0 0 36 5 5 2 2 7

N G E D [AQ] P G Y Y E A Y Q Q [LR] G E P Y S V E A A M A **K** L F A S E T A M E V T T  
18 43 4 1 1 1 1 1 1 1 1 1 1 1 1 3 13 20 45 58 38 25 57 67 80 54 92 100 59 40 86 49 57 30 84 54 44 80 61 43

K A V **Q** I H **G G** Y **G** Y T K E Y Y P V E R M M **R D** A K I T E **I** Y **E G T** S E V Q R  
38 80 58 97 40 42 99 99 78 100 86 39 41 52 76 1 69 73 91 88 55 48 98 95 90 77 81 65 50 97 79 95 100 97 63 81 56 83 65

M V I A G N L L K  
49 83 90 48 29 22 55 55 41

Etfa

M N L A D Y K G G V W V F A E Q R E E G K L Q K V S L E L L G K G R E L A D S I  
44 40 44 22 38 62 64 1 67 70 53 81 67 60 87 85 64 3 42 74 32 46 43 33 81 35 51 94 91 59 80 46 59 53 43 74 90 39 2 2

P K L G T Q I A L K D A G D E L A D F A G K K E A A I K S V D V A A A T L E E  
2 27 58 55 16 5 5 5 5 5 5 5 5 5 5 5 5 5 5 4 4 5 4 5 4 4 5 5 5 3 5 4 5 3 4 4 5 5 5 5 5

D D Q E L K N K V A D V K K N N P D A V E L T A V L L G S N V K E G L A K E L  
4 5 4 4 4 5 4 5 5 5 4 4 5 4 5 5 5 5 5 5 5 5 23 43 52 44 79 56 74 45 97 28 33 60 4 31 28 55 52 28 49 81

I - [AE] Y G A D K V I V V D D P L L K H Y T T E A Y T K A I A D L I N E Y K P E  
33 0 21 59 92 87 88 56 90 31 56 52 67 44 53 31 85 43 18 82 40 89 47 32 91 48 41 51 47 24 29 45 63 35 40 24 77 95 66

I V L V G A T A I G R D L A P R V A A R L G T G L T A D C T K L E I D D E K Y  
59 41 81 26 94 92 93 19 65 100 92 96 88 54 91 85 60 58 55 82 43 23 90 97 91 89 89 98 87 92 27 86 42 63 56 13 6 4 3

K D F P L E S S T I D L S K Q - - - - N A I P G K E [FS] E E E T G N L L M T R P  
2 2 14 10 6 2 2 3 3 2 3 2 2 3 2 0 0 0 0 4 7 4 8 9 4 11 2 3 21 28 23 24 24 79 53 48 92 97 100

A F G G N L M A T I V C P D H R P Q M A T V R P G V M K K L E K D E G R T G A  
88 87 91 98 92 53 76 92 85 90 35 81 59 39 36 91 93 90 88 46 96 92 99 91 78 89 63 25 67 31 37 27 46 38 25 44 28 51 5

G E V E E [FV] K V A K L N A E N V N S Q I T D S G K I I N L K S D L T E S D I R  
8 47 51 40 24 24 18 34 1 20 39 1 1 1 1 1 1 1 1 1 1 1 1 1 1 1 1 1 1 1 1 1 1 1 1 1 1 1 1 1 1 27 31 24 55 38 35

V K V L E V V K E A - K G G D K V D I T E A K I L V S G G R G V G S D V K E N  
44 44 41 38 55 42 47 65 32 24 0 48 3 4 27 19 64 60 61 31 49 97 39 55 49 95 81 86 99 93 99 36 68 39 3 3 34 71 54

F K G G L - L E E L A D V L G G G E V G A S R A A V D A G W I D H D R Q V G Q  
83 33 1 1 44 0 73 40 53 95 99 37 24 64 55 29 75 28 77 44 44 94 100 86 51 77 84 54 96 82 46 36 35 44 33 99 93 100 98

T G K T V R P K L Y I A C G I S G A I Q H L A G M E D S D Y I I A I N K D P D  
93 100 81 91 98 69 100 25 52 98 57 97 68 100 98 99 100 98 91 100 98 51 88 100 93 38 39 87 54 27 92 65 97 89 99 84 81 35 28

A P I F K V A D Y G I V G D L F K I V P E L I E E L K  
99 90 95 76 23 60 88 86 55 83 71 95 93 97 61 23 58 50 47 97 30 72 45 51 29 43 56

Etfß  
M  
92  
K I V V C I K Q V P D T E T E V K L D P V T G T L I R D G V P S I M N P D D K  
48 81 62 90 85 59 99 94 95 90 95 86 12 51 49 45 52 33 69 66 40 49 62 79 74 52 86 45 76 63 60 49 86 44 100 95 62 100 55

A G L E E A L R L K D E Y G - K G [DG] G - A E V T V I T M G P P Q A E A A L R E  
35 55 77 98 47 88 84 48 70 91 65 27 30 17 0 1 1 6 57 0 56 41 81 62 76 47 59 87 100 74 81 52 86 48 39 27 88 78 69

A L A M G A D R A I L V T D R A F G G A D T L A T S N T L A A A I R K L G E E  
79 53 95 72 99 76 97 39 62 59 91 44 54 85 85 33 70 71 88 73 99 86 46 84 88 86 24 48 60 80 44 84 46 39 44 42 14 8 6

E G V E D Y D L I I A G R Q A I D G D T A Q V G P Q I A E H L G L P Q V T Y V  
5 9 4 10 42 38 87 59 67 59 32 100 65 94 77 88 100 87 92 87 89 98 94 97 87 65 69 92 79 55 98 54 52 83 62 42 55 67 54

E E I E V [EK] Y L E S E A E Q K K [EV] P G L V L S A D G K S V T V K R Q L E D G Y  
27 31 48 19 3 14 16 21 40 5 5 3 5 3 3 4 2 5 3 3 3 3 3 3 5 20 26 30 33 36 35 75 47 84 33 22 80 58 49 48

K H V L E V K L P C L I T V L K E L D N - - - - - - - - - - - - - - - - N E  
1 30 23 43 47 41 38 42 99 49 69 51 97 34 52 27 56 49 3 28 0 0 0 0 0 0 0 0 0 0 0 0 0 0 0 0 0 0 0 0 0 0 49 36

P R Y M T V - - - G G I - F I C D - A F D N - - - K E I E V W T R A D L K E K  
88 98 88 60 37 52 0 0 0 37 52 70 0 24 1 1 45 0 71 34 32 8 0 0 0 45 45 42 40 39 63 34 16 23 58 55 2 2 25

D D P L V K D - - - - - - - - - - - - P S N I G L K G S P T K V K K S F T K G  
23 5 5 5 43 2 80 0 0 0 0 0 0 0 0 0 0 0 0 0 0 33 30 28 44 87 84 51 86 87 81 87 40 76 23 69 44 67 44 55 22

V K G - A G E [IK] V E D V D A K E A A - - - G D G [MV] N D P E G T A D I I V [DE] K L  
24 64 28 0 45 76 24 19 23 27 20 22 26 37 26 55 42 2 0 0 0 10 10 10 3 5 9 10 3 8 6 51 17 24 49 28 28 67 89

K E K [FH] I I  
46 62 69 22 42 66
