# Supplementary figures and images for: Revealing the Bacterial Butyrate Synthesis Pathways by Analyzing (Meta)genomic Data
Source: PubMed Central journal article supplement — mBio. 2014 Apr 22;5(2):e00889-14. doi: 10.1128/mBio.00889-14 (PMC3994512; doi:10.1128/mbio.00889-14), 2014-04-22

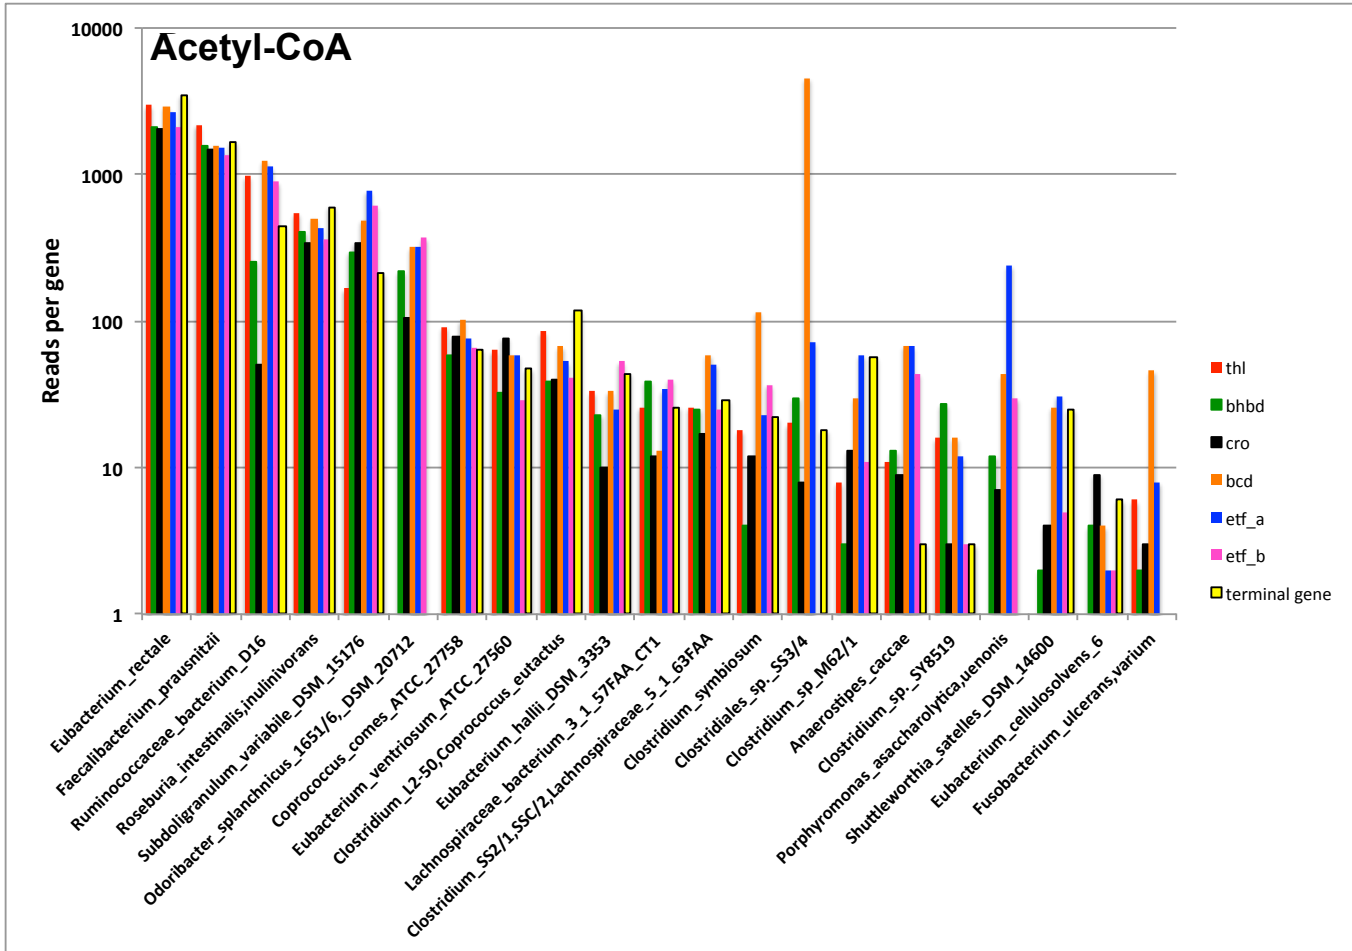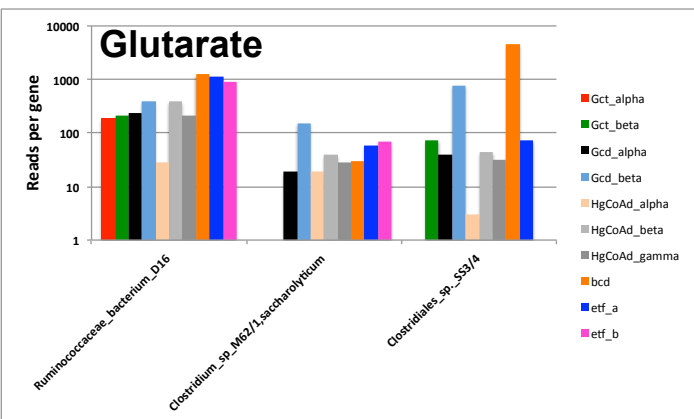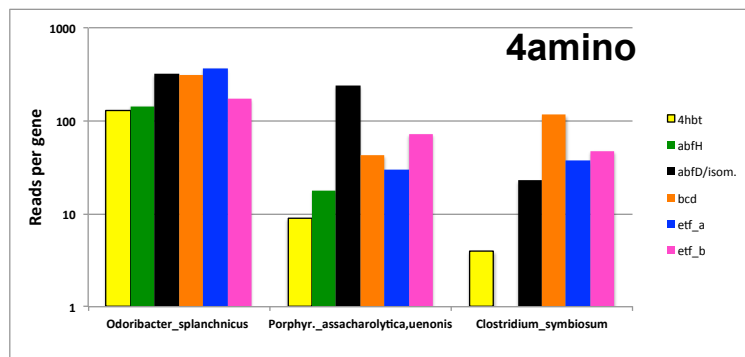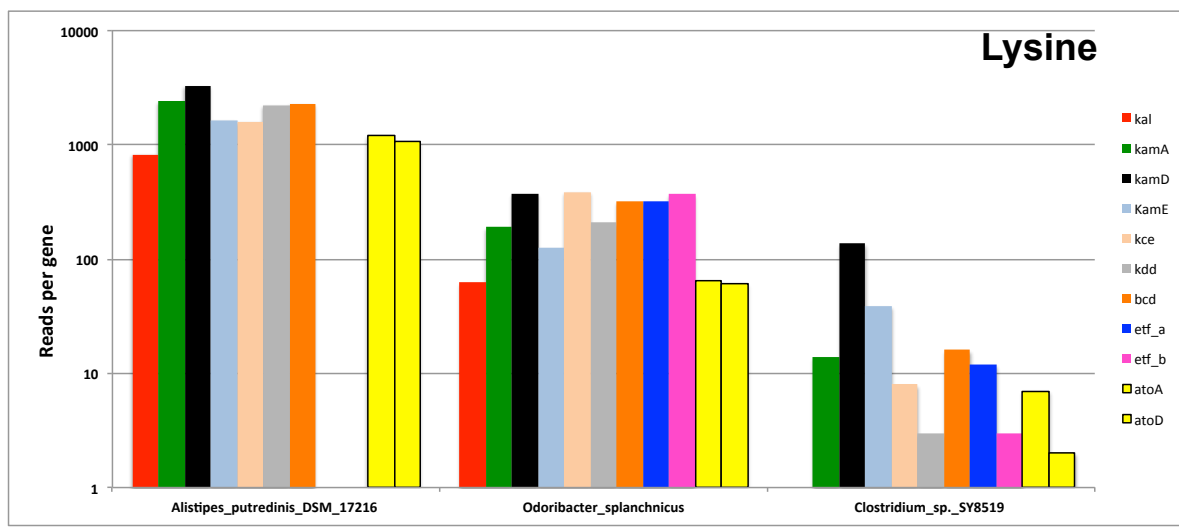

Supplement: mbo002141784sf05.pdf [file mbo002141784sf05.pdf]
